# Supplementary material for: Examination of Oral Squamous Cell Carcinoma and Precancerous Lesions Using Proximity Extension Assay and Salivary RNA Quantification
Source: MDPI journal article supplement (doi:10.3390/biomedicines8120610), 2020-12-14
Supplement: s1 [file s1]

## 4E-BP1 (EIF4EBP1)

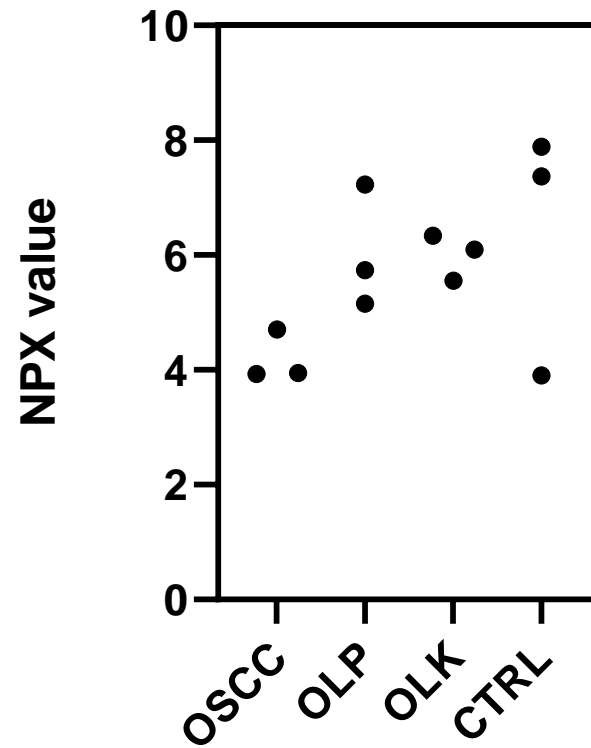

## ADA

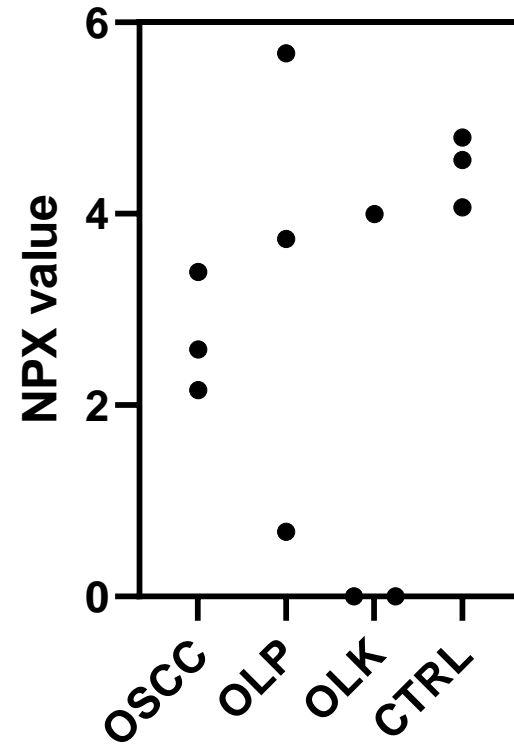

## ANXA1

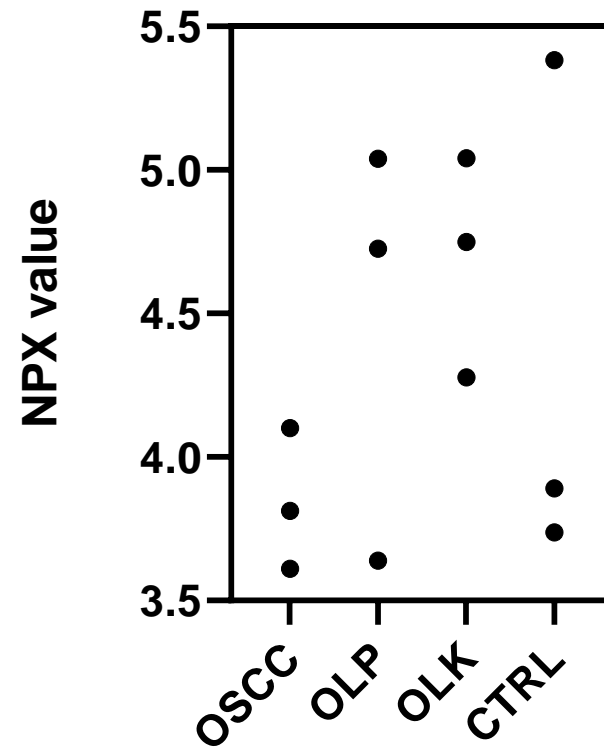

## AREG

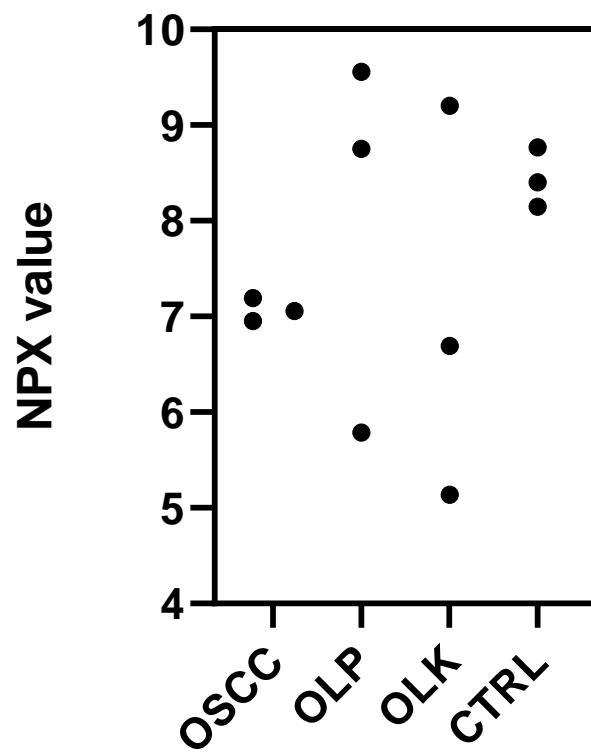

## CCL11

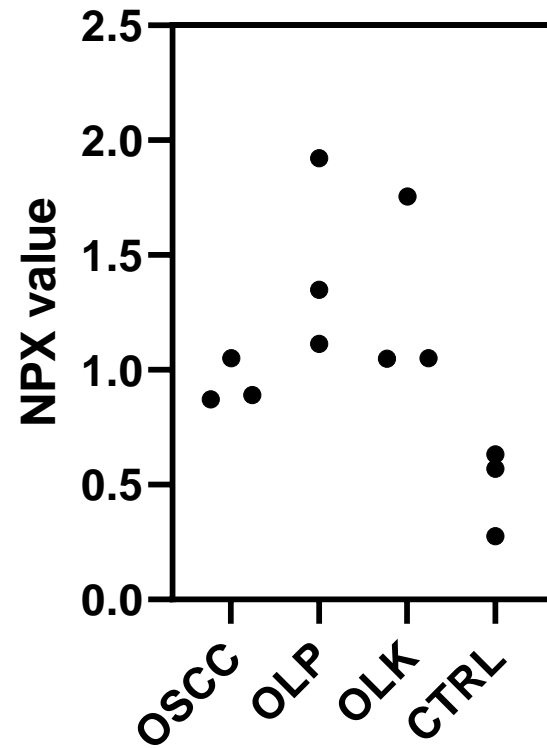

## CCL20

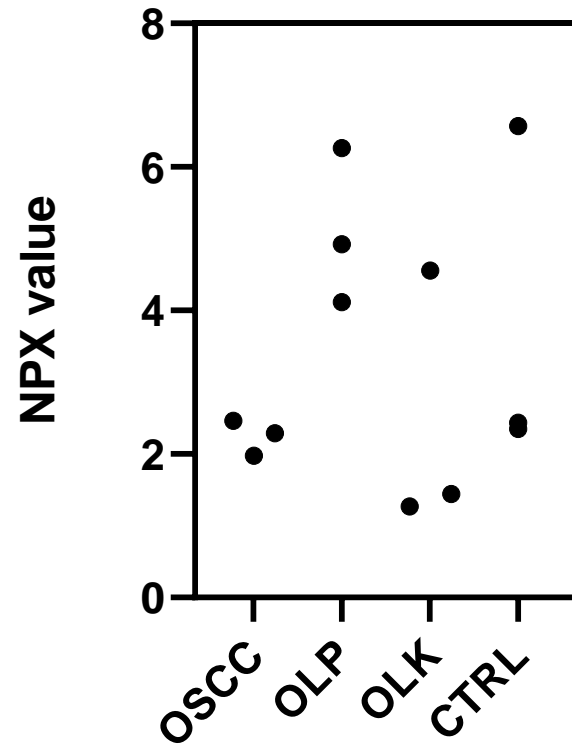

## CCL28

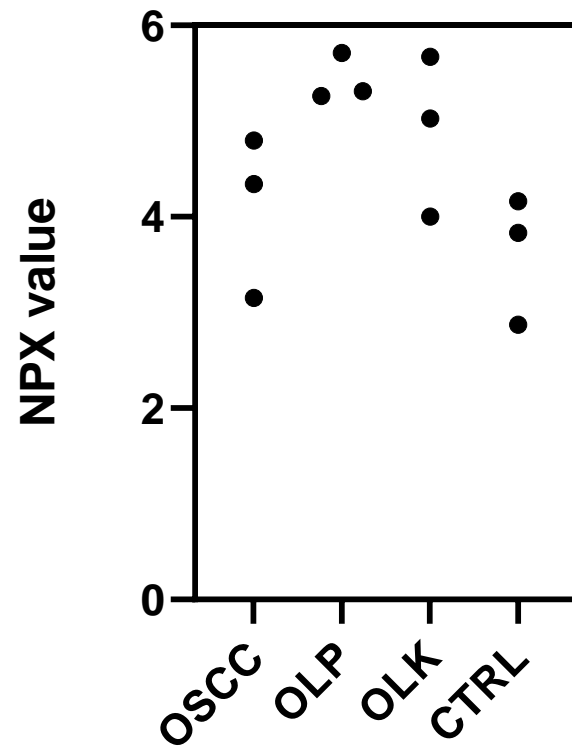

## CD5

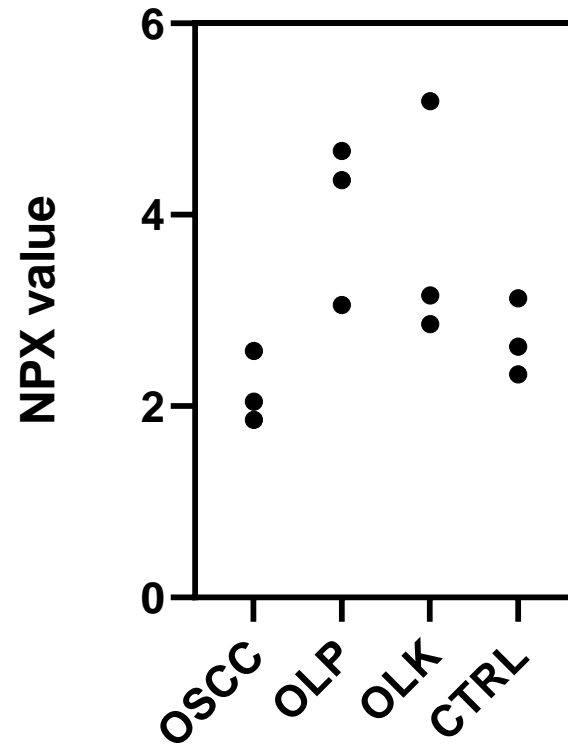



## CST5

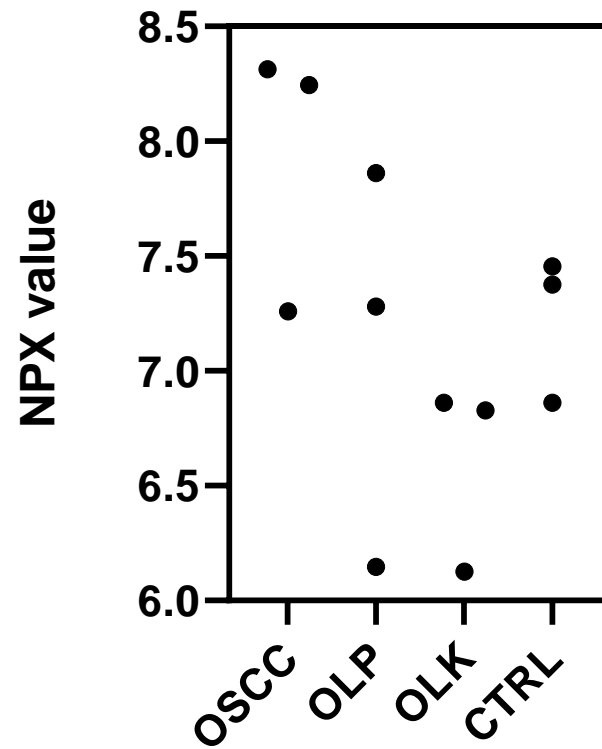

## CX3CL1

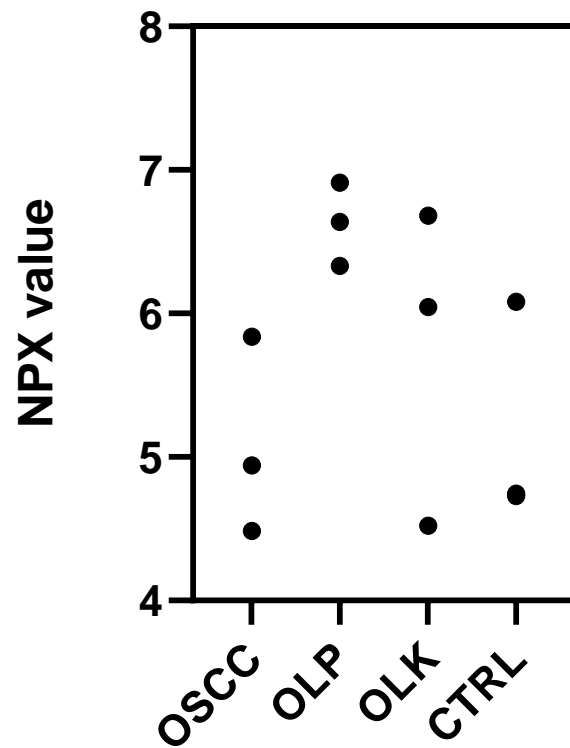

## CXCL1

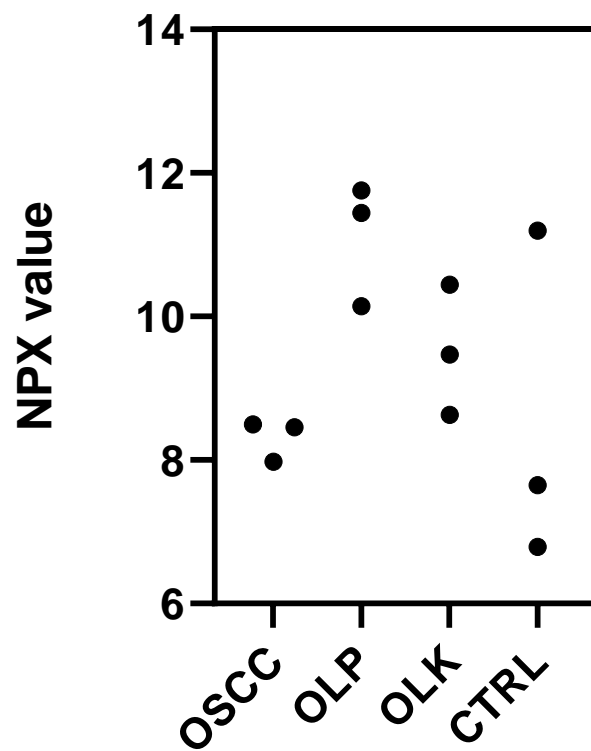

## CXCL5

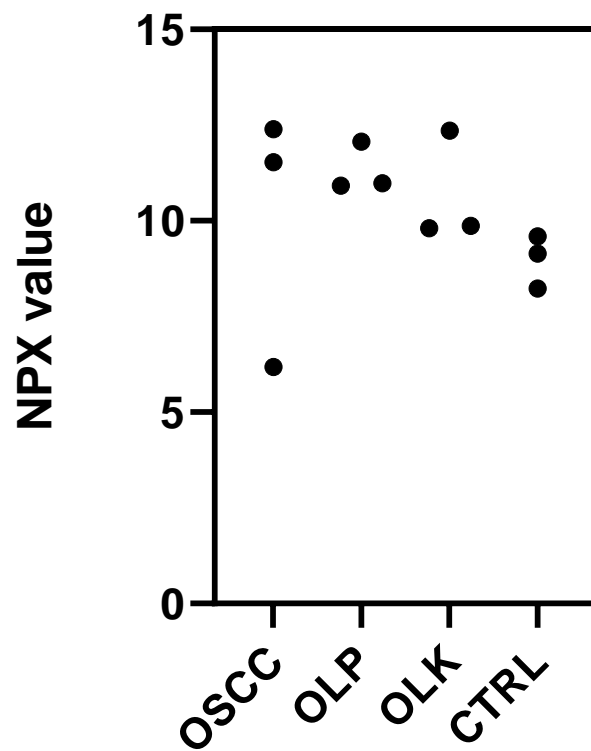

## CXCL9

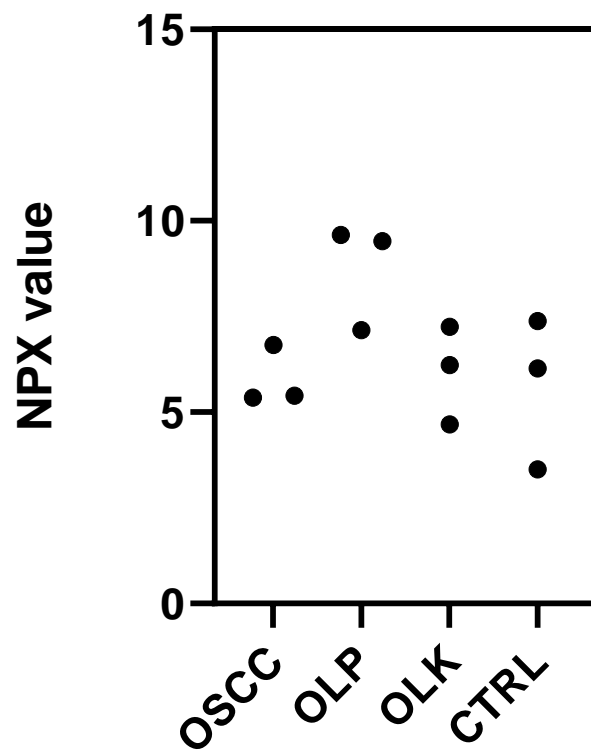

## CXCL10

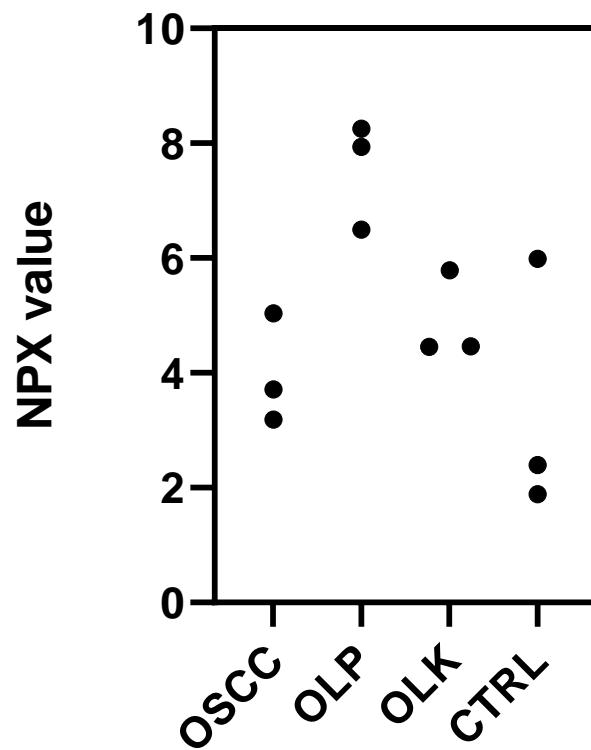

## CXCL11

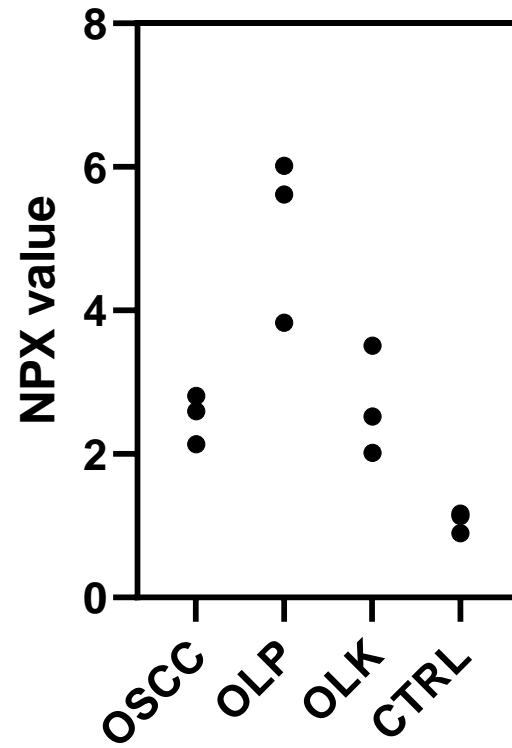

## CYR61

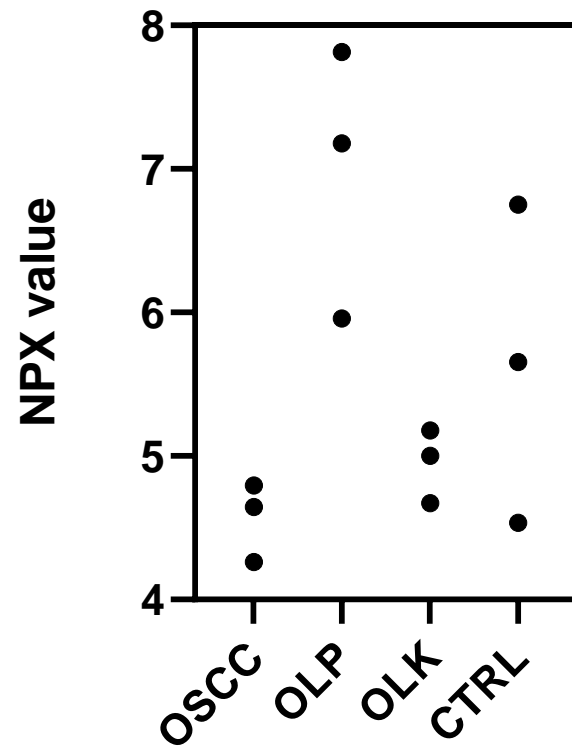



## EGF

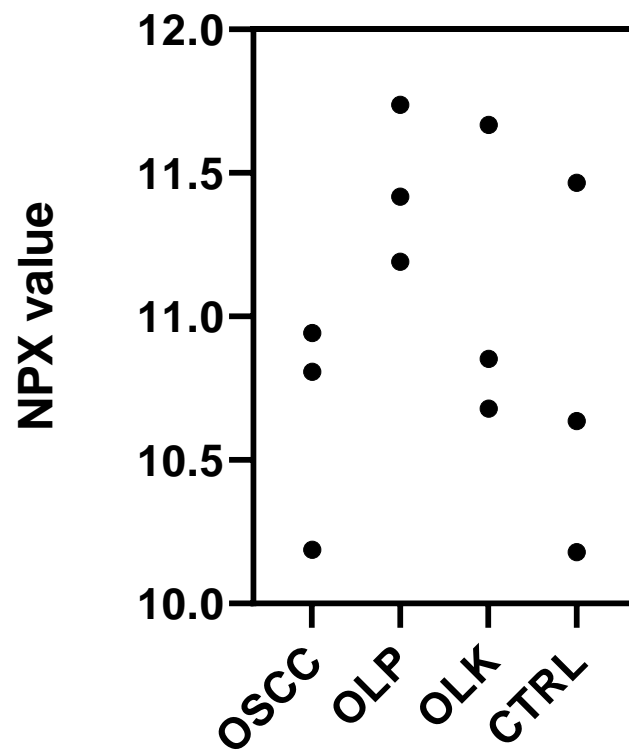

## ESM1

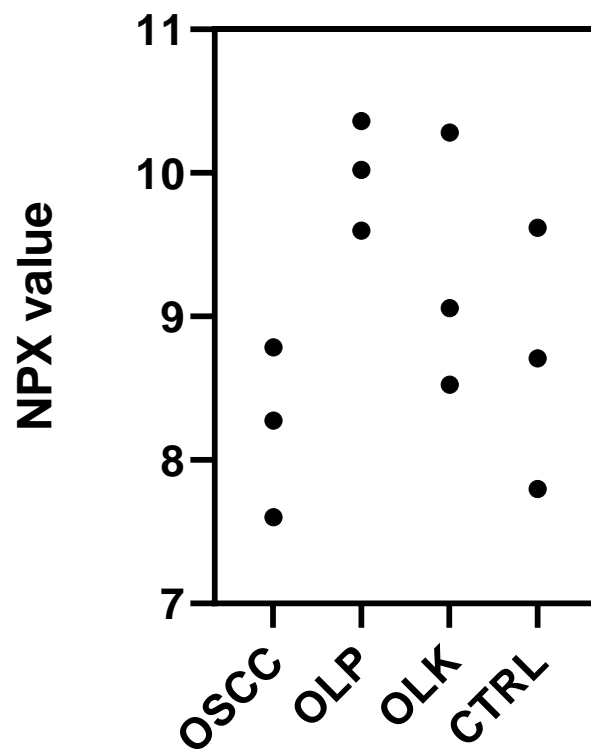

## FR-alpha

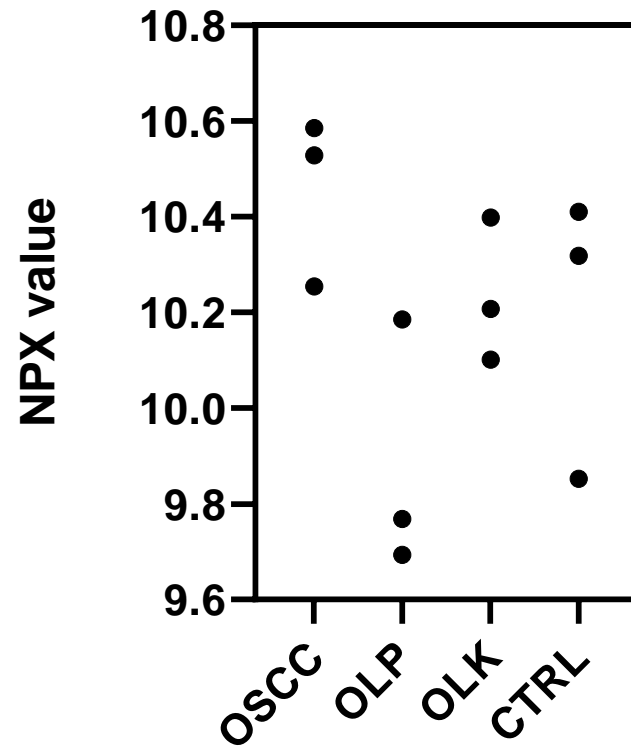

## GPNMB

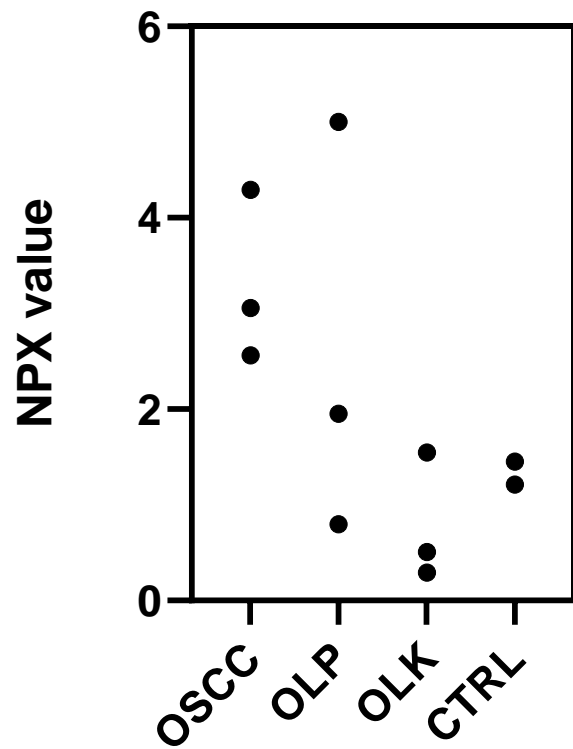

## IL1 alpha

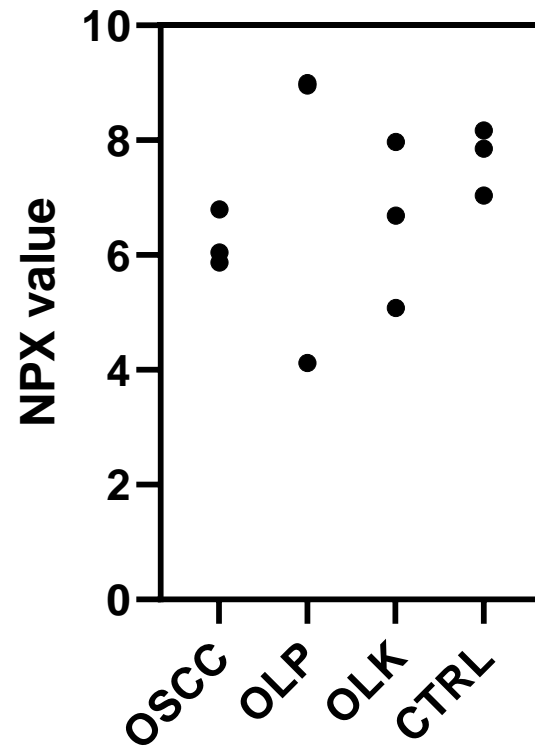

## IL6 (inflammation)

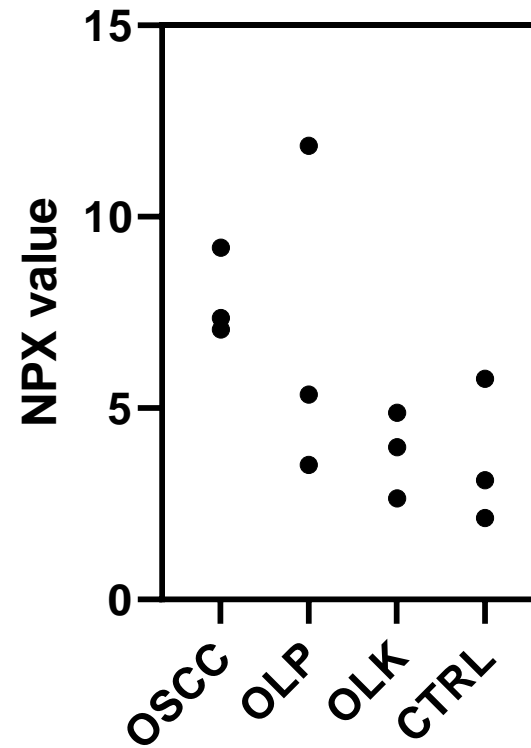

## IL6 (oncology)

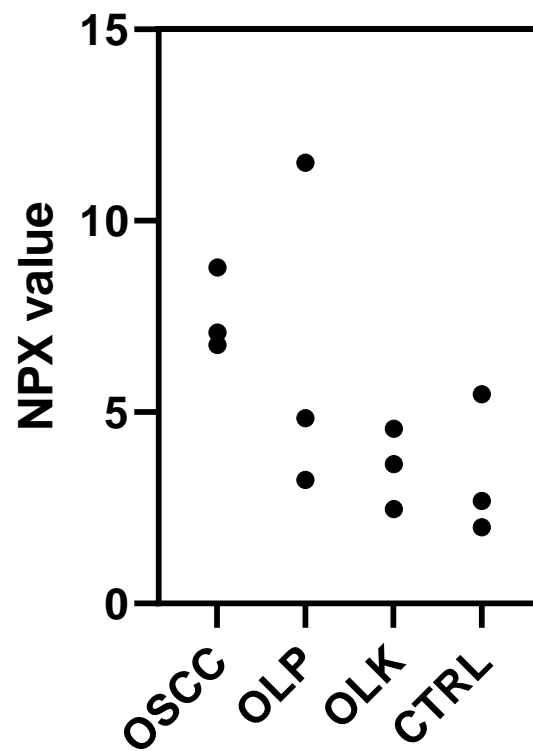

## LIF-R

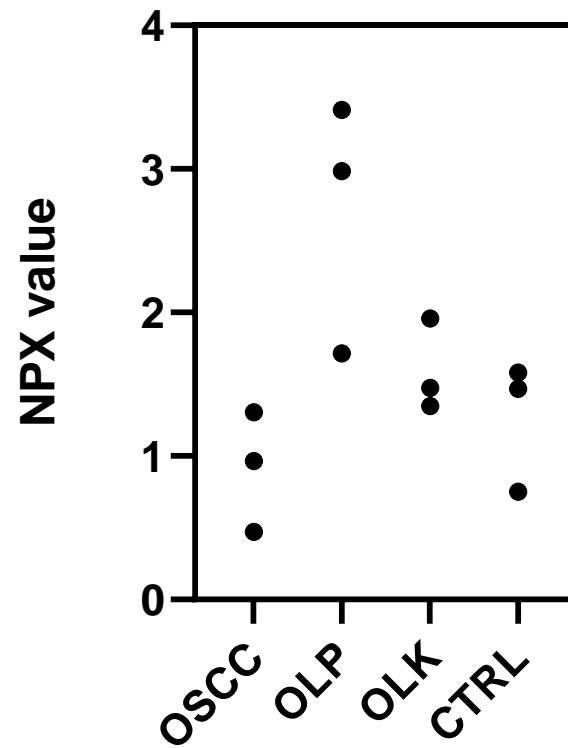



## MCP-1 (CCL2)

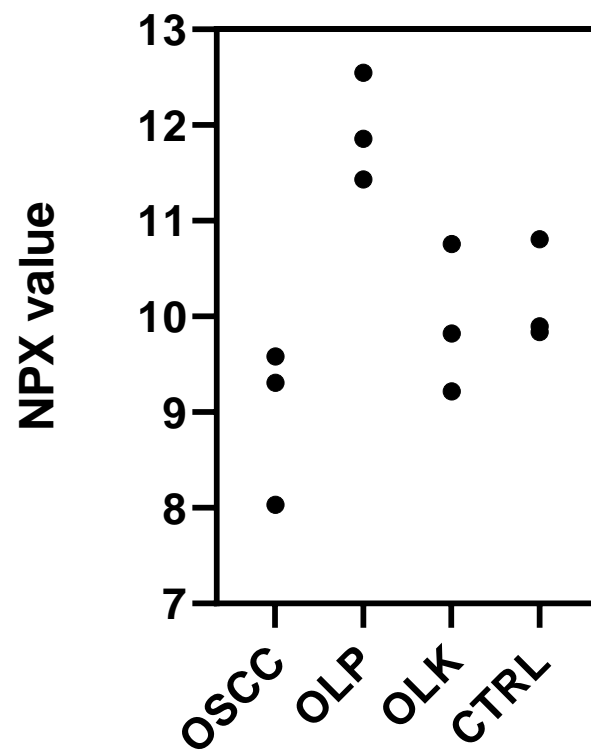

## MIA

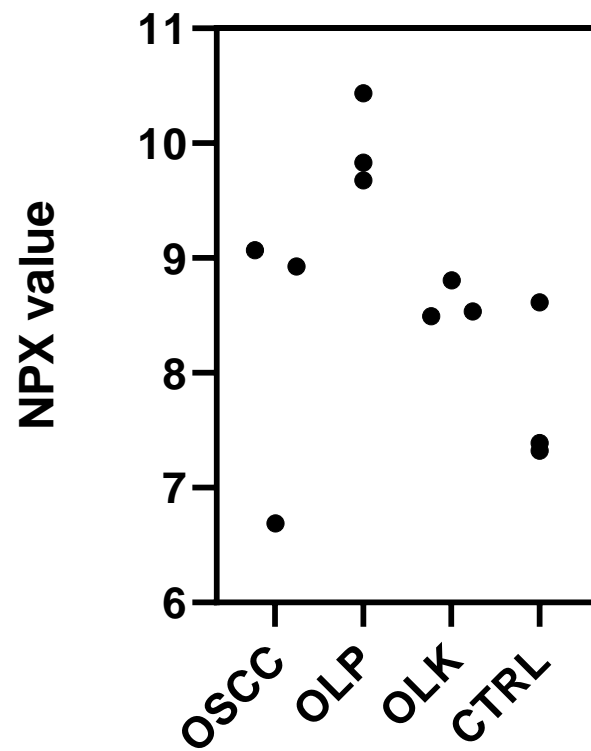

## MK (MDK)

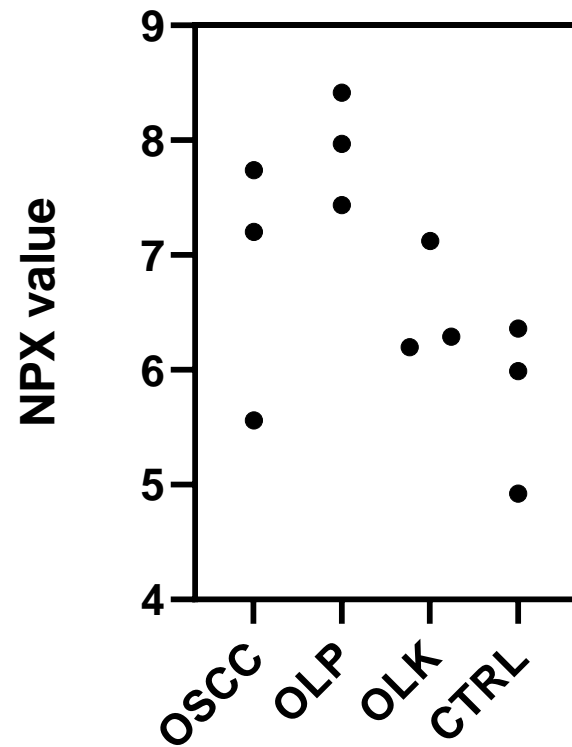

## MMP1

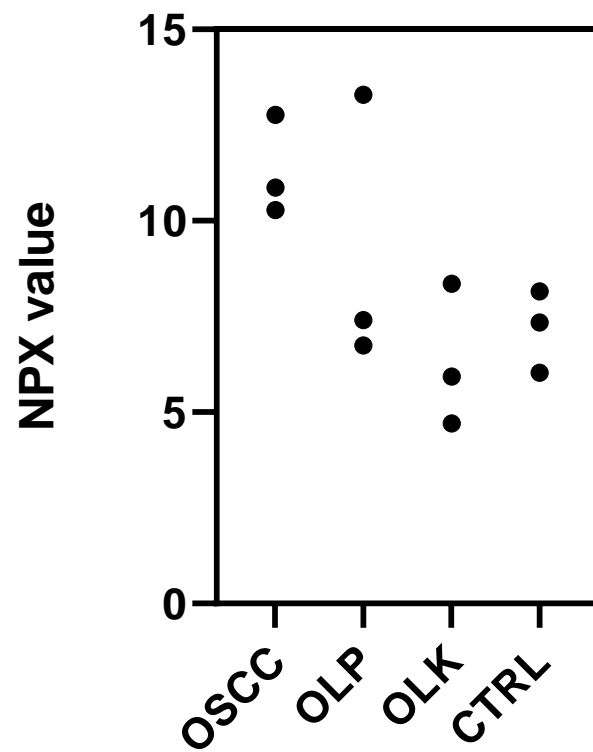

## MMP10

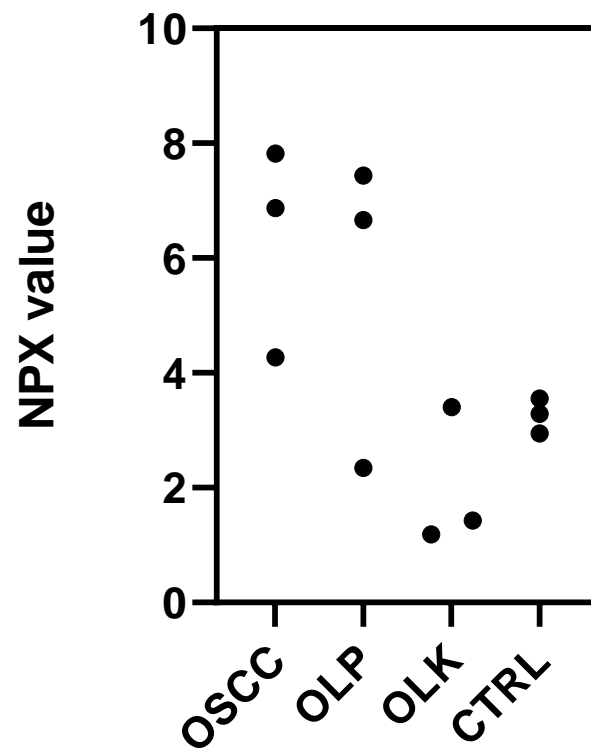

## MUC-16(CA-125/Mucin 16)

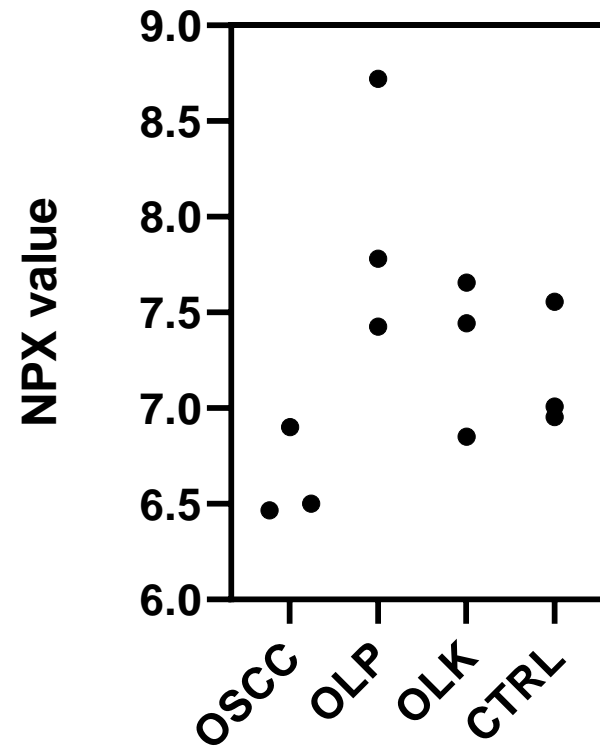

## PODXL

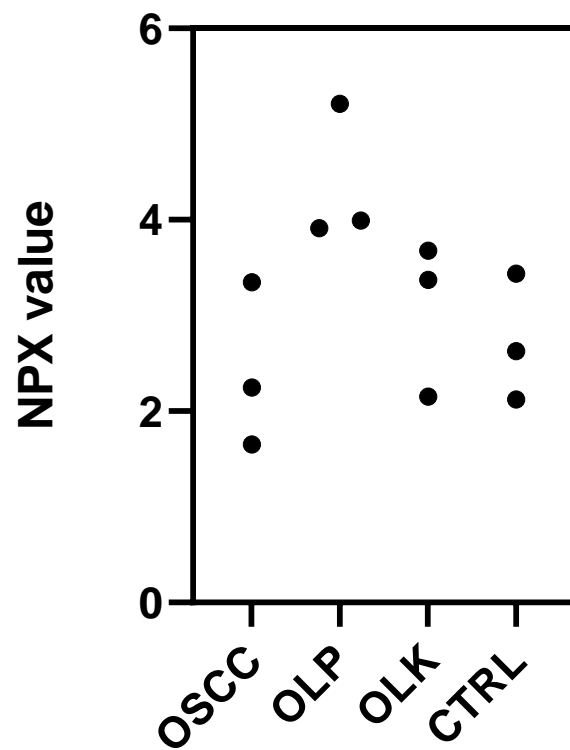

## RSPO3

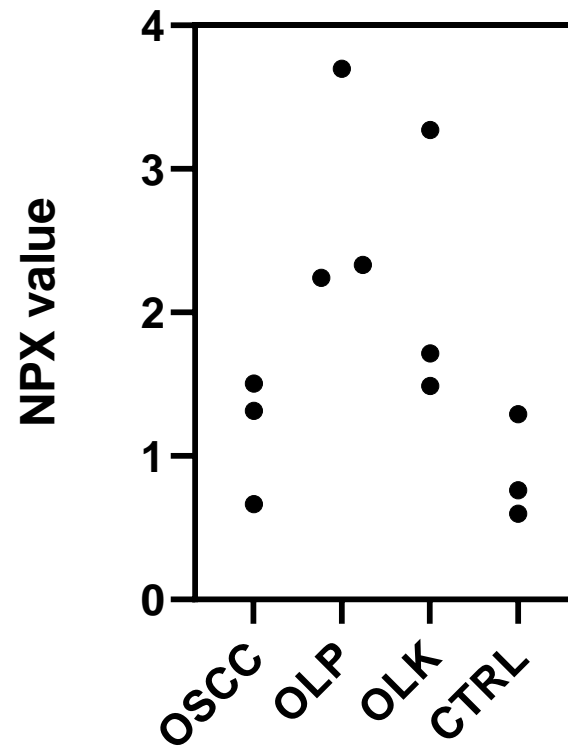



## TFPI-2

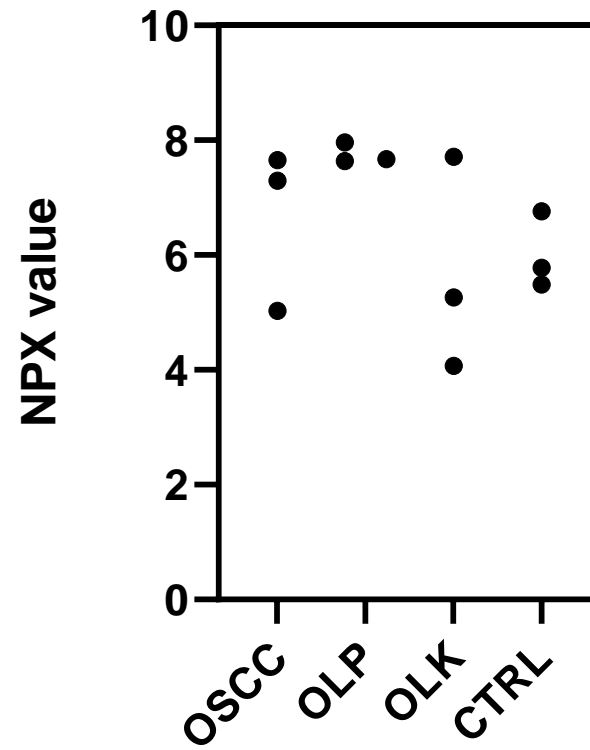

## TLR3

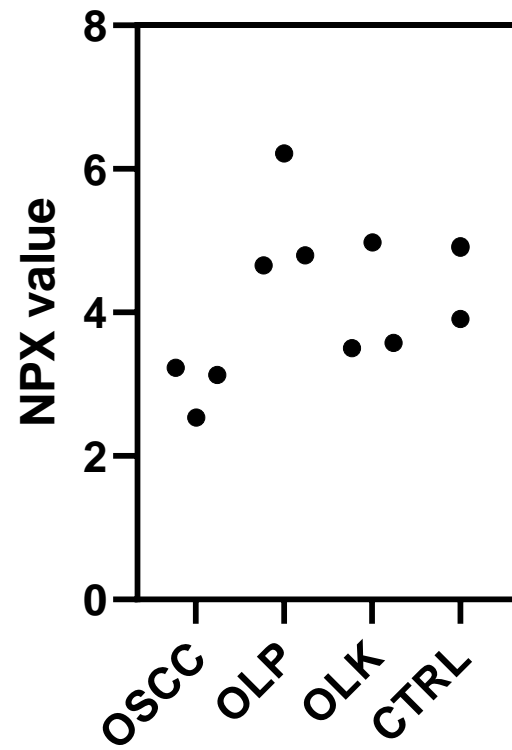

## TNFB (LTA)

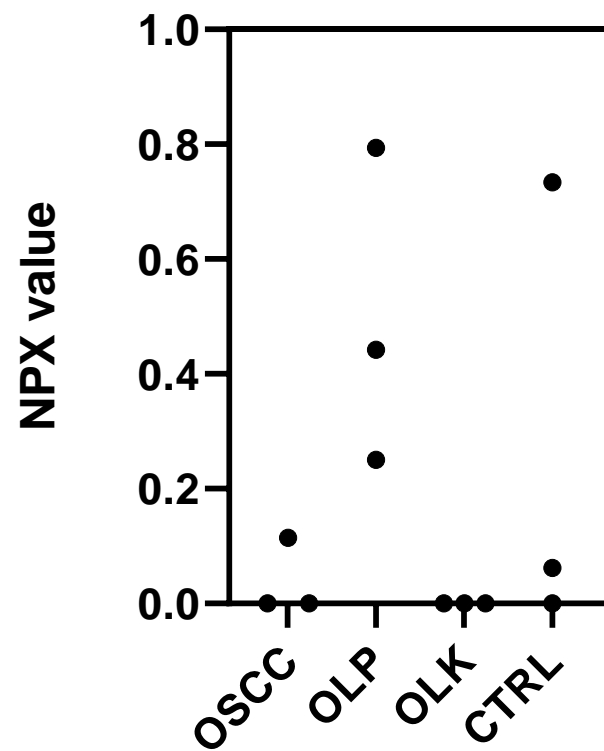

## TRAIL (TNFSF10)

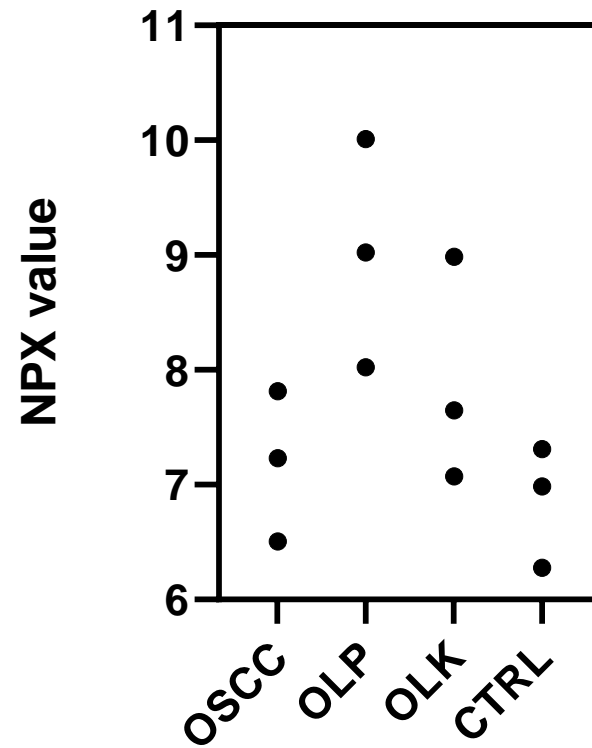

## TWEAK (TNFSF12)

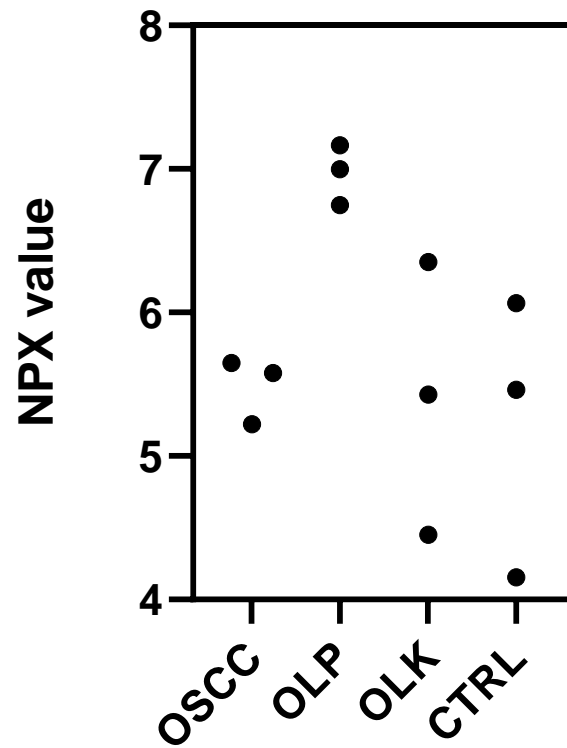

## WFDC2

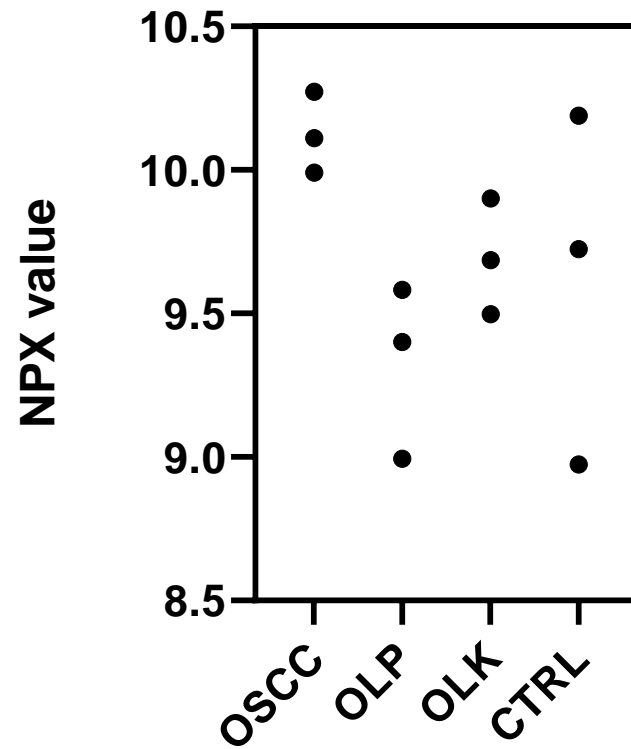

|                    | OSCC-CTRL | OLP-CTRL | OLK-CTRL | OSCC-OLP | OSCC-OLK | OLP-OLK |
|--------------------|-----------|----------|----------|----------|----------|---------|
| 4E-BP1             | 0,218     | 0,816    | 0,785    | 0,051    | 0,006    | 0,947   |
| ADA                | 0,014     | 0,493    | 0,139    | 0,685    | 0,375    | 0,362   |
| ANXA1              | 0,413     | 0,856    | 0,569    | 0,234    | 0,032    | 0,667   |
| AREG               | 0,002     | 0,758    | 0,298    | 0,489    | 0,964    | 0,569   |
| CCL11              | 0,023     | 0,021    | 0,038    | 0,101    | 0,275    | 0,628   |
| CCL20              | 0,382     | 0,438    | 0,480    | 0,011    | 0,881    | 0,097   |
| CCL28              | 0,488     | 0,012    | 0,108    | 0,059    | 0,309    | 0,355   |
| CD5                | 0,167     | 0,071    | 0,248    | 0,026    | 0,108    | 0,755   |
| CX3CL1             | 0,880     | 0,040    | 0,510    | 0,024    | 0,430    | 0,256   |
| CXCL1              | 0,879     | 0,148    | 0,540    | 0,006    | 0,094    | 0,090   |
| CXCL10             | 0,713     | 0,042    | 0,341    | 0,010    | 0,262    | 0,019   |
| CXCL11             | 0,003     | 0,024    | 0,023    | 0,020    | 0,748    | 0,037   |
| CXCL5              | 0,647     | 0,013    | 0,145    | 0,578    | 0,779    | 0,518   |
| CXCL9              | 0,893     | 0,093    | 0,800    | 0,035    | 0,836    | 0,069   |
| CYR61              | 0,177     | 0,187    | 0,348    | 0,013    | 0,154    | 0,023   |
| CST5               | 0,142     | 0,815    | 0,109    | 0,238    | 0,033    | 0,429   |
| EGF                | 0,809     | 0,167    | 0,562    | 0,046    | 0,334    | 0,328   |
| ESM-1              | 0,480     | 0,087    | 0,477    | 0,012    | 0,162    | 0,279   |
| FR-alpha           | 0,261     | 0,249    | 0,837    | 0,036    | 0,176    | 0,115   |
| GPNMB              | 0,018     | 0,413    | 0,315    | 0,623    | 0,017    | 0,242   |
| IL-1 alpha         | 0,031     | 0,860    | 0,288    | 0,562    | 0,719    | 0,691   |
| IL6 (inflammation) | 0,030     | 0,304    | 0,902    | 0,734    | 0,012    | 0,304   |
| IL6 (oncology)     | 0,028     | 0,316    | 0,890    | 0,719    | 0,011    | 0,319   |
| LIF-R              | 0,377     | 0,066    | 0,363    | 0,034    | 0,089    | 0,110   |
| MCP-1              | 0,102     | 0,017    | 0,675    | 0,007    | 0,216    | 0,022   |
| MIA                | 0,633     | 0,010    | 0,179    | 0,095    | 0,670    | 0,005   |
| MK                 | 0,242     | 0,013    | 0,209    | 0,196    | 0,702    | 0,026   |
| MMP-1              | 0,013     | 0,415    | 0,532    | 0,384    | 0,019    | 0,295   |
| MMP-10             | 0,047     | 0,296    | 0,157    | 0,683    | 0,028    | 0,115   |
| MUC-16             | 0,082     | 0,136    | 0,665    | 0,030    | 0,068    | 0,221   |
| PODXL              | 0,644     | 0,045    | 0,605    | 0,040    | 0,393    | 0,106   |
| RSPO3              | 0,445     | 0,022    | 0,100    | 0,041    | 0,181    | 0,459   |
| TFPI-2             | 0,514     | 0,012    | 0,788    | 0,312    | 0,509    | 0,126   |
| TLR3               | 0,015     | 0,342    | 0,393    | 0,014    | 0,117    | 0,157   |
| TNFB               | 0,436     | 0,463    | 0,376    | 0,049    | 0,423    | 0,036   |
| TRAIL              | 0,516     | 0,030    | 0,165    | 0,060    | 0,342    | 0,251   |
| TWEAK              | 0,682     | 0,039    | 0,827    | 0,001    | 0,905    | 0,050   |
| WFDC2              | 0,245     | 0,485    | 0,869    | 0,014    | 0,039    | 0,153   |
