# Supplementary material for: Examination of Oral Squamous Cell Carcinoma and Precancerous Lesions Using Proximity Extension Assay and Salivary RNA Quantification
Source: MDPI journal article supplement (doi:10.3390/biomedicines8120610), 2020-12-14
Supplement: s1 [file s1]

Enriched GO functions for OLP vs. control groups

[explain columns](#)

| Biological Process (Gene Ontology) |                                     |                         |                 |                             |
|------------------------------------|-------------------------------------|-------------------------|-----------------|-----------------------------|
| <i>GO-term</i>                     | <i>description</i>                  | <i>count in network</i> | <i>strength</i> | <i>false discovery rate</i> |
| GO:0048246                         | macrophage chemotaxis               | 2 of 14                 | 2.3             | 0.00058                     |
| GO:0010818                         | T cell chemotaxis                   | 2 of 15                 | 2.27            | 0.00063                     |
| GO:0072678                         | T cell migration                    | 3 of 26                 | 2.21            | 2.47e-05                    |
| GO:1901623                         | regulation of lymphocyte chemotaxis | 2 of 21                 | 2.12            | 0.0010                      |
| GO:0048247                         | lymphocyte chemotaxis               | 4 of 45                 | 2.09            | 1.68e-06                    |
| (more ...)                         |                                     |                         |                 |                             |

| Molecular Function (Gene Ontology) |                                        |                         |                 |                             |
|------------------------------------|----------------------------------------|-------------------------|-----------------|-----------------------------|
| <i>GO-term</i>                     | <i>description</i>                     | <i>count in network</i> | <i>strength</i> | <i>false discovery rate</i> |
| GO:0048248                         | CXCR3 chemokine receptor binding       | 2 of 5                  | 2.75            | 8.87e-05                    |
| GO:0045236                         | CXCR chemokine receptor binding        | 3 of 16                 | 2.42            | 3.00e-06                    |
| GO:0008009                         | chemokine activity                     | 7 of 48                 | 2.31            | 3.36e-13                    |
| GO:0048020                         | CCR chemokine receptor binding         | 3 of 41                 | 2.01            | 3.68e-05                    |
| GO:0005164                         | tumor necrosis factor receptor binding | 2 of 31                 | 1.96            | 0.0018                      |
| (more ...)                         |                                        |                         |                 |                             |

| Cellular Component (Gene Ontology) |                      |                         |                 |                             |
|------------------------------------|----------------------|-------------------------|-----------------|-----------------------------|
| <i>GO-term</i>                     | <i>description</i>   | <i>count in network</i> | <i>strength</i> | <i>false discovery rate</i> |
| GO:0005902                         | microvillus          | 2 of 82                 | 1.53            | 0.0491                      |
| GO:0005615                         | extracellular space  | 10 of 1134              | 1.09            | 1.66e-08                    |
| GO:0005576                         | extracellular region | 13 of 2505              | 0.86            | 2.91e-09                    |

| Reference publications (PubMed) |                                                                 |                         |                 |                             |
|---------------------------------|-----------------------------------------------------------------|-------------------------|-----------------|-----------------------------|
| <i>publication</i>              | <i>(year) title</i>                                             | <i>count in network</i> | <i>strength</i> | <i>false discovery rate</i> |
| PMID:31740970                   | (2020) Novel associations between cytokines and pulmonar...     | 3 of 3                  | 3.15            | 1.31e-06                    |
| PMID:9164978                    | (1997) Expression of IFN-inducible protein-10 in chronic hep... | 2 of 2                  | 3.15            | 8.65e-05                    |
| PMID:8903849                    | (1995) Central nervous system chemokine mRNA accumula...        | 2 of 2                  | 3.15            | 8.65e-05                    |
| PMID:8472896                    | (1993) Astrocyte expression of mRNA encoding cytokines l...     | 2 of 2                  | 3.15            | 8.65e-05                    |
| PMID:33192326                   | (2020) Phenotyping CCL2 Containing Central Amygdala Neu...      | 2 of 2                  | 3.15            | 8.65e-05                    |
| (more ...)                      |                                                                 |                         |                 |                             |

| local network cluster (STRING) |                                                             |                         |                 |                             |
|--------------------------------|-------------------------------------------------------------|-------------------------|-----------------|-----------------------------|
| <i>cluster</i>                 | <i>description</i>                                          | <i>count in network</i> | <i>strength</i> | <i>false discovery rate</i> |
| CL:7370                        | CXCR3 chemokine receptor binding                            | 2 of 5                  | 2.75            | 4.52e-05                    |
| CL:7490                        | mixed, incl. CCR2 chemokine receptor binding, and CC che... | 2 of 7                  | 2.6             | 7.10e-05                    |
| CL:7361                        | Chemokine receptors bind chemokines                         | 4 of 29                 | 2.29            | 5.51e-08                    |
| CL:7359                        | Chemokine receptors bind chemokines                         | 5 of 37                 | 2.28            | 1.87e-09                    |
| CL:7364                        | CXC Chemokine domain, and dendritic cell chemotaxis         | 3 of 24                 | 2.24            | 4.21e-06                    |
| (more ...)                     |                                                             |                         |                 |                             |

| KEGG Pathways  |                                        |                         |                 |                             |
|----------------|----------------------------------------|-------------------------|-----------------|-----------------------------|
| <i>pathway</i> | <i>description</i>                     | <i>count in network</i> | <i>strength</i> | <i>false discovery rate</i> |
| hsa04657       | IL-17 signaling pathway                | 4 of 92                 | 1.78            | 4.36e-06                    |
| hsa04062       | Chemokine signaling pathway            | 7 of 181                | 1.73            | 2.73e-10                    |
| hsa04668       | TNF signaling pathway                  | 4 of 108                | 1.71            | 6.07e-06                    |
| hsa04060       | Cytokine-cytokine receptor interaction | 9 of 263                | 1.68            | 7.95e-13                    |
| hsa05323       | Rheumatoid arthritis                   | 2 of 84                 | 1.52            | 0.0070                      |
| (more ...)     |                                        |                         |                 |                             |

Enriched GO functions for OLK vs. control groups

Expand Columns

| Biological Process (Gene Ontology) |                                                            |                         |                 |                             |
|------------------------------------|------------------------------------------------------------|-------------------------|-----------------|-----------------------------|
| <i>GO-term</i>                     | <i>description</i>                                         | <i>count in network</i> | <i>strength</i> | <i>false discovery rate</i> |
| GO:0048247                         | lymphocyte chemotaxis                                      | 2 of 45                 | 2.64            | 0.0017                      |
| GO:0070098                         | chemokine-mediated signaling pathway                       | 2 of 75                 | 2.42            | 0.0017                      |
| GO:0044364                         | disruption of cells of other organism                      | 2 of 89                 | 2.34            | 0.0017                      |
| GO:0031640                         | killing of cells of other organism                         | 2 of 89                 | 2.34            | 0.0017                      |
| GO:0061844                         | antimicrobial humoral immune response mediated by antim... | 2 of 107                | 2.26            | 0.0017                      |
| (more ...)                         |                                                            |                         |                 |                             |

| Molecular Function (Gene Ontology) |                    |                         |                 |                             |
|------------------------------------|--------------------|-------------------------|-----------------|-----------------------------|
| <i>GO-term</i>                     | <i>description</i> | <i>count in network</i> | <i>strength</i> | <i>false discovery rate</i> |
| GO:0008009                         | chemokine activity | 2 of 48                 | 2.61            | 0.00014                     |

| Cellular Component (Gene Ontology) |                     |                         |                 |                             |
|------------------------------------|---------------------|-------------------------|-----------------|-----------------------------|
| <i>GO-term</i>                     | <i>description</i>  | <i>count in network</i> | <i>strength</i> | <i>false discovery rate</i> |
| GO:0005615                         | extracellular space | 2 of 1134               | 1.24            | 0.0135                      |

| Reference publications (PubMed) |                                                                |                         |                 |                             |
|---------------------------------|----------------------------------------------------------------|-------------------------|-----------------|-----------------------------|
| <i>publication</i>              | <i>(year) title</i>                                            | <i>count in network</i> | <i>strength</i> | <i>false discovery rate</i> |
| PMID:15212760                   | (2004) Lysophospholipids and chemokines activate distinct ...  | 2 of 3                  | 3.81            | 0.00070                     |
| PMID:24273921                   | (2013) Expression of CC chemokines CCL2, CCL5, and CCL...      | 2 of 5                  | 3.59            | 0.00074                     |
| PMID:19700933                   | (2009) Corneal and conjunctival fibroblasts are major sourc... | 2 of 6                  | 3.51            | 0.00074                     |
| PMID:18515987                   | (2008) The local cytokine and chemokine milieu within mali...  | 2 of 6                  | 3.51            | 0.00074                     |
| PMID:16613763                   | (2006) Synthetic chemokines directly labeled with a fluores... | 2 of 6                  | 3.51            | 0.00074                     |
| (more ...)                      |                                                                |                         |                 |                             |

| local network cluster (STRING) |                               |                         |                 |                             |
|--------------------------------|-------------------------------|-------------------------|-----------------|-----------------------------|
| <i>cluster</i>                 | <i>description</i>            | <i>count in network</i> | <i>strength</i> | <i>false discovery rate</i> |
| CL:7134                        | G alpha (i) signalling events | 2 of 196                | 2.0             | 0.0016                      |

| KEGG Pathways  |                                        |                         |                 |                             |
|----------------|----------------------------------------|-------------------------|-----------------|-----------------------------|
| <i>pathway</i> | <i>description</i>                     | <i>count in network</i> | <i>strength</i> | <i>false discovery rate</i> |
| hsa04062       | Chemokine signaling pathway            | 2 of 181                | 2.03            | 0.00043                     |
| hsa04060       | Cytokine-cytokine receptor interaction | 2 of 263                | 1.87            | 0.00046                     |

Enriched GO functions for OSCC vs. control groups

[explain columns](#)

| > Biological Process (Gene Ontology) |                                                             |                         |                 |                             |
|--------------------------------------|-------------------------------------------------------------|-------------------------|-----------------|-----------------------------|
| <i>GO-term</i>                       | <i>description</i>                                          | <i>count in network</i> | <i>strength</i> | <i>false discovery rate</i> |
| GO:0045073                           | regulation of chemokine biosynthetic process                | 2 of 11                 | 2.55            | 0.00072                     |
| GO:0060444                           | branching involved in mammary gland duct morphogenesis      | 2 of 21                 | 2.27            | 0.0014                      |
| GO:0010574                           | regulation of vascular endothelial growth factor production | 2 of 32                 | 2.09            | 0.0022                      |
| GO:0032722                           | positive regulation of chemokine production                 | 3 of 56                 | 2.02            | 0.00021                     |
| GO:0030574                           | collagen catabolic process                                  | 2 of 37                 | 2.02            | 0.0026                      |
| (more ...)                           |                                                             |                         |                 |                             |

| > Molecular Function (Gene Ontology) |                                |                         |                 |                             |
|--------------------------------------|--------------------------------|-------------------------|-----------------|-----------------------------|
| <i>GO-term</i>                       | <i>description</i>             | <i>count in network</i> | <i>strength</i> | <i>false discovery rate</i> |
| GO:0008009                           | chemokine activity             | 2 of 48                 | 1.91            | 0.0023                      |
| GO:0005125                           | cytokine activity              | 5 of 216                | 1.66            | 2.16e-06                    |
| GO:0070851                           | growth factor receptor binding | 3 of 131                | 1.65            | 0.00045                     |
| GO:0004222                           | metalloendopeptidase activity  | 2 of 110                | 1.55            | 0.0088                      |
| GO:0005126                           | cytokine receptor binding      | 4 of 272                | 1.46            | 0.00012                     |
| (more ...)                           |                                |                         |                 |                             |

| Cellular Component (Gene Ontology) |                      |                         |                 |                             |
|------------------------------------|----------------------|-------------------------|-----------------|-----------------------------|
| <i>GO-term</i>                     | <i>description</i>   | <i>count in network</i> | <i>strength</i> | <i>false discovery rate</i> |
| GO:0005615                         | extracellular space  | 7 of 1134               | 1.08            | 2.01e-05                    |
| GO:0005576                         | extracellular region | 8 of 2505               | 0.8             | 0.00011                     |

| > Reference publications (PubMed) |                                                                 |                         |                 |                             |
|-----------------------------------|-----------------------------------------------------------------|-------------------------|-----------------|-----------------------------|
| <i>publication</i>                | <i>(year) title</i>                                             | <i>count in network</i> | <i>strength</i> | <i>false discovery rate</i> |
| PMID:27383261                     | (2016) Epithelial-mesenchymal interaction during photodyn...    | 3 of 3                  | 3.29            | 4.70e-06                    |
| PMID:16520862                     | (2006) Sunscreens with an absorption maximum of > or =36...     | 3 of 3                  | 3.29            | 4.70e-06                    |
| PMID:11876526                     | (2002) Direct role of human dermal fibroblasts and indirect ... | 3 of 3                  | 3.29            | 4.70e-06                    |
| PMID:9914427                      | (1999) Exposure of macrophage-like cells to titanium particl... | 2 of 2                  | 3.29            | 0.00015                     |
| PMID:9881751                      | (1998) Development of glycosylated human interleukin-1 alp...   | 2 of 2                  | 3.29            | 0.00015                     |
| (more ...)                        |                                                                 |                         |                 |                             |

| local network cluster (STRING) |                                                          |                         |                 |                             |
|--------------------------------|----------------------------------------------------------|-------------------------|-----------------|-----------------------------|
| <i>cluster</i>                 | <i>description</i>                                       | <i>count in network</i> | <i>strength</i> | <i>false discovery rate</i> |
| CL:914                         | Peptidase M10A, cysteine switch, zinc binding site       | 2 of 5                  | 2.89            | 0.00028                     |
| CL:3634                        | interleukin-1-mediated signaling pathway, and TIR domain | 2 of 60                 | 1.81            | 0.0049                      |
| CL:7134                        | G alpha (i) signalling events                            | 2 of 196                | 1.3             | 0.0187                      |

| > KEGG Pathways |                                  |                         |                 |                             |
|-----------------|----------------------------------|-------------------------|-----------------|-----------------------------|
| <i>pathway</i>  | <i>description</i>               | <i>count in network</i> | <i>strength</i> | <i>false discovery rate</i> |
| hsa05020        | Prion diseases                   | 2 of 33                 | 2.07            | 0.0014                      |
| hsa05332        | Graft-versus-host disease        | 2 of 36                 | 2.04            | 0.0014                      |
| hsa05323        | Rheumatoid arthritis             | 3 of 84                 | 1.84            | 0.00039                     |
| hsa04657        | IL-17 signaling pathway          | 3 of 92                 | 1.8             | 0.00039                     |
| hsa05321        | Inflammatory bowel disease (IBD) | 2 of 62                 | 1.8             | 0.0034                      |
| (more ...)      |                                  |                         |                 |                             |



Enriched GO functions for OLP vs. OSCC groups

[explain columns](#)

| > Biological Process (Gene Ontology) |                                                                  |                         |                 |                             |
|--------------------------------------|------------------------------------------------------------------|-------------------------|-----------------|-----------------------------|
| <i>GO-term</i>                       | <i>description</i>                                               | <i>count in network</i> | <i>strength</i> | <i>false discovery rate</i> |
| GO:0010818                           | T cell chemotaxis                                                | 3 of 15                 | 2.31            | 1.02e-05                    |
| GO:0072678                           | T cell migration                                                 | 5 of 26                 | 2.3             | 1.68e-08                    |
| GO:0048246                           | macrophage chemotaxis                                            | 2 of 14                 | 2.17            | 0.00093                     |
| GO:0051770                           | positive regulation of nitric-oxide synthase biosynthetic pro... | 2 of 16                 | 2.11            | 0.0011                      |
| GO:0048247                           | lymphocyte chemotaxis                                            | 5 of 45                 | 2.06            | 1.14e-07                    |
| (more ...)                           |                                                                  |                         |                 |                             |

| > Molecular Function (Gene Ontology) |                                    |                         |                 |                             |
|--------------------------------------|------------------------------------|-------------------------|-----------------|-----------------------------|
| <i>GO-term</i>                       | <i>description</i>                 | <i>count in network</i> | <i>strength</i> | <i>false discovery rate</i> |
| GO:0048248                           | CXCR3 chemokine receptor binding   | 3 of 5                  | 2.79            | 5.14e-07                    |
| GO:0045236                           | CXCR chemokine receptor binding    | 4 of 16                 | 2.41            | 4.01e-08                    |
| GO:0008009                           | chemokine activity                 | 7 of 48                 | 2.18            | 5.41e-12                    |
| GO:0005520                           | insulin-like growth factor binding | 2 of 25                 | 1.92            | 0.0019                      |
| GO:0048020                           | CCR chemokine receptor binding     | 3 of 41                 | 1.88            | 9.91e-05                    |
| (more ...)                           |                                    |                         |                 |                             |

| Cellular Component (Gene Ontology) |                                  |                         |                 |                             |
|------------------------------------|----------------------------------|-------------------------|-----------------|-----------------------------|
| <i>GO-term</i>                     | <i>description</i>               | <i>count in network</i> | <i>strength</i> | <i>false discovery rate</i> |
| GO:0009897                         | external side of plasma membrane | 3 of 223                | 1.14            | 0.0487                      |
| GO:0005615                         | extracellular space              | 12 of 1134              | 1.04            | 2.98e-09                    |
| GO:0005576                         | extracellular region             | 16 of 2505              | 0.82            | 4.10e-10                    |

| > Reference publications (PubMed) |                                                               |                         |                 |                             |
|-----------------------------------|---------------------------------------------------------------|-------------------------|-----------------|-----------------------------|
| <i>publication</i>                | <i>(year) title</i>                                           | <i>count in network</i> | <i>strength</i> | <i>false discovery rate</i> |
| PMID:27510253                     | (2016) Genetic polymorphisms of CCL2 associated with sus...   | 4 of 4                  | 3.01            | 1.81e-08                    |
| PMID:25982097                     | (2015) The exaggerated inflammatory response in Behcet's ...  | 4 of 4                  | 3.01            | 1.81e-08                    |
| PMID:21274880                     | (2011) Serum chemokine CXC ligand 10 (CXCL10) predicts f...   | 4 of 4                  | 3.01            | 1.81e-08                    |
| PMID:17304353                     | (2007) Shear stress-induced changes in atherosclerotic pla... | 4 of 4                  | 3.01            | 1.81e-08                    |
| PMID:9730616                      | (1998) The human gene encoding SCYB9B, a putative novel ...   | 3 of 3                  | 3.01            | 1.48e-06                    |
| (more ...)                        |                                                               |                         |                 |                             |

| local network cluster (STRING) |                                                               |                         |                 |                             |
|--------------------------------|---------------------------------------------------------------|-------------------------|-----------------|-----------------------------|
| <i>cluster</i>                 | <i>description</i>                                            | <i>count in network</i> | <i>strength</i> | <i>false discovery rate</i> |
| CL:7370                        | CXCR3 chemokine receptor binding                              | 3 of 5                  | 2.79            | 5.02e-07                    |
| CL:7361                        | Chemokine receptors bind chemokines                           | 5 of 29                 | 2.25            | 1.23e-08                    |
| CL:7364                        | CXC Chemokine domain, and dendritic cell chemotaxis           | 4 of 24                 | 2.23            | 1.70e-07                    |
| CL:7488                        | CC chemokine, conserved site, and chemokine (C-C motif) li... | 2 of 14                 | 2.17            | 0.00071                     |
| CL:7134                        | G alpha (i) signalling events                                 | 7 of 196                | 1.57            | 1.87e-08                    |

| > KEGG Pathways |                                        |                         |                 |                             |
|-----------------|----------------------------------------|-------------------------|-----------------|-----------------------------|
| <i>pathway</i>  | <i>description</i>                     | <i>count in network</i> | <i>strength</i> | <i>false discovery rate</i> |
| hsa04668        | TNF signaling pathway                  | 5 of 108                | 1.68            | 1.11e-06                    |
| hsa04657        | IL-17 signaling pathway                | 4 of 92                 | 1.65            | 2.58e-05                    |
| hsa04620        | Toll-like receptor signaling pathway   | 4 of 102                | 1.61            | 3.07e-05                    |
| hsa04062        | Chemokine signaling pathway            | 7 of 181                | 1.6             | 7.98e-09                    |
| hsa04060        | Cytokine-cytokine receptor interaction | 10 of 263               | 1.59            | 1.01e-12                    |
| (more ...)      |                                        |                         |                 |                             |

Enriched GO functions for OLK vs. OSCC groups

[explain columns](#)

| <div>&gt;</div> Biological Process (Gene Ontology) |                                      |                         |                 |                             |
|----------------------------------------------------|--------------------------------------|-------------------------|-----------------|-----------------------------|
| <i>GO-term</i>                                     | <i>description</i>                   | <i>count in network</i> | <i>strength</i> | <i>false discovery rate</i> |
| GO:0001780                                         | neutrophil homeostasis               | 2 of 11                 | 2.65            | 0.0090                      |
| GO:0002828                                         | regulation of type 2 immune response | 2 of 30                 | 2.21            | 0.0101                      |
| GO:0030574                                         | collagen catabolic process           | 2 of 37                 | 2.12            | 0.0101                      |
| GO:0031018                                         | endocrine pancreas development       | 2 of 38                 | 2.11            | 0.0101                      |
| GO:0002548                                         | monocyte chemotaxis                  | 2 of 41                 | 2.08            | 0.0101                      |

(more ...)

| Molecular Function (Gene Ontology) |                                                |                         |                 |                             |
|------------------------------------|------------------------------------------------|-------------------------|-----------------|-----------------------------|
| <i>GO-term</i>                     | <i>description</i>                             | <i>count in network</i> | <i>strength</i> | <i>false discovery rate</i> |
| GO:0004869                         | cysteine-type endopeptidase inhibitor activity | 2 of 57                 | 1.93            | 0.0200                      |
| GO:0004222                         | metalloendopeptidase activity                  | 2 of 110                | 1.65            | 0.0200                      |
| GO:0004252                         | serine-type endopeptidase activity             | 2 of 180                | 1.43            | 0.0332                      |
| GO:0004857                         | enzyme inhibitor activity                      | 3 of 388                | 1.28            | 0.0200                      |
| GO:0098772                         | molecular function regulator                   | 5 of 1793               | 0.83            | 0.0200                      |

| Cellular Component (Gene Ontology) |                      |                         |                 |                             |
|------------------------------------|----------------------|-------------------------|-----------------|-----------------------------|
| <i>GO-term</i>                     | <i>description</i>   | <i>count in network</i> | <i>strength</i> | <i>false discovery rate</i> |
| GO:0005615                         | extracellular space  | 5 of 1134               | 1.03            | 0.0025                      |
| GO:0005576                         | extracellular region | 6 of 2505               | 0.77            | 0.0039                      |

| <div>&gt;</div> Reference publications (PubMed) |                                                                  |                         |                 |                             |
|-------------------------------------------------|------------------------------------------------------------------|-------------------------|-----------------|-----------------------------|
| <i>publication</i>                              | <i>(year) title</i>                                              | <i>count in network</i> | <i>strength</i> | <i>false discovery rate</i> |
| PMID:8486377                                    | (1993) The order and orientation of a cluster of metalloprot...  | 2 of 2                  | 3.39            | 0.0018                      |
| PMID:33243243                                   | (2020) Multi-omics examination of Q fever fatigue syndrom...     | 2 of 2                  | 3.39            | 0.0018                      |
| PMID:32725166                                   | (2020) Salivary and Serum Inflammatory Profiles Reflect Dif...   | 2 of 2                  | 3.39            | 0.0018                      |
| PMID:32698696                                   | (2020) Mixture of enzyme-processed Panax ginseng and Ga...       | 2 of 2                  | 3.39            | 0.0018                      |
| PMID:31734236                                   | (2020) Intraluminal fluid infusion in a rat jejunum ischemiar... | 2 of 2                  | 3.39            | 0.0018                      |

(more ...)

| local network cluster (STRING) |                                                       |                         |                 |                             |
|--------------------------------|-------------------------------------------------------|-------------------------|-----------------|-----------------------------|
| <i>cluster</i>                 | <i>description</i>                                    | <i>count in network</i> | <i>strength</i> | <i>false discovery rate</i> |
| CL:914                         | Peptidase M10A, cysteine switch, zinc binding site    | 2 of 5                  | 2.99            | 0.00013                     |
| CL:32169                       | mixed, incl. Cadherin-like, and C2H2-type zinc finger | 2 of 191                | 1.41            | 0.0187                      |

| KEGG Pathways  |                                           |                         |                 |                             |
|----------------|-------------------------------------------|-------------------------|-----------------|-----------------------------|
| <i>pathway</i> | <i>description</i>                        | <i>count in network</i> | <i>strength</i> | <i>false discovery rate</i> |
| hsa01521       | EGFR tyrosine kinase inhibitor resistance | 2 of 78                 | 1.8             | 0.0241                      |
| hsa05323       | Rheumatoid arthritis                      | 2 of 84                 | 1.77            | 0.0241                      |
| hsa04657       | IL-17 signaling pathway                   | 2 of 92                 | 1.73            | 0.0241                      |
| hsa04066       | HIF-1 signaling pathway                   | 2 of 98                 | 1.7             | 0.0241                      |
| hsa04218       | Cellular senescence                       | 2 of 156                | 1.5             | 0.0241                      |

Enriched GO functions for OLP vs. OLK groups

[explain columns](#)

| Molecular Function (Gene Ontology) |                            |                         |                 |                             |
|------------------------------------|----------------------------|-------------------------|-----------------|-----------------------------|
| <i>GO-term</i>                     | <i>description</i>         | <i>count in network</i> | <i>strength</i> | <i>false discovery rate</i> |
| GO:0008083                         | growth factor activity     | 2 of 160                | 1.79            | 0.0033                      |
| GO:0008201                         | heparin binding            | 2 of 161                | 1.78            | 0.0033                      |
| GO:0048018                         | receptor ligand activity   | 3 of 458                | 1.51            | 0.0012                      |
| GO:0005102                         | signaling receptor binding | 4 of 1513               | 1.11            | 0.0012                      |

| Cellular Component (Gene Ontology) |                      |                         |                 |                             |
|------------------------------------|----------------------|-------------------------|-----------------|-----------------------------|
| <i>GO-term</i>                     | <i>description</i>   | <i>count in network</i> | <i>strength</i> | <i>false discovery rate</i> |
| GO:0005576                         | extracellular region | 4 of 2505               | 0.89            | 0.0043                      |

| Reference publications (PubMed) |                                                                   |                         |                 |                             |
|---------------------------------|-------------------------------------------------------------------|-------------------------|-----------------|-----------------------------|
| <i>publication</i>              | <i>(year) title</i>                                               | <i>count in network</i> | <i>strength</i> | <i>false discovery rate</i> |
| PMID:19339092                   | (2009) Kidney pathological changes in metabolic syndrome:....     | 2 of 2                  | 3.69            | 0.0057                      |
| PMID:29284973                   | (2017) Successful Nonsurgical Management of Periapical L...       | 2 of 3                  | 3.51            | 0.0057                      |
| PMID:19166774                   | (2009) An extract of green tea, epigallocatechin-3-gallate, re... | 2 of 3                  | 3.51            | 0.0057                      |
| PMID:18755182                   | (2008) The matrix protein CCN1 (CYR61) promotes prolifera...      | 2 of 3                  | 3.51            | 0.0057                      |
| PMID:12386288                   | (2002) Midkine expression in the course of nephrogenesis a...     | 2 of 3                  | 3.51            | 0.0057                      |

(more ...)
