# Supplementary material for: Examination of Oral Squamous Cell Carcinoma and Precancerous Lesions Using Proximity Extension Assay and Salivary RNA Quantification
Source: Biomedicines. 2020 Dec 14;8(12):610. doi: 10.3390/biomedicines8120610 (PMC7764999; doi:10.3390/biomedicines8120610)
Supplement: Supplementary file 1 [file biomedicines-08-00610-s001.zip › TableS1.xlsx]

## Sheet: Munka2
Sample code	Sample group	Type of assay
OLK01	OLK	ELISA	qPCR
OLK02	OLK	ELISA	qPCR
OLK03	OLK	ELISA	qPCR
OLK04	OLK	ELISA	qPCR
OLK05	OLK	ELISA	qPCR	PEA
OLK06	OLK	ELISA	qPCR
OLK07	OLK	ELISA	qPCR
OLK08	OLK	ELISA	qPCR
OLK09	OLK	ELISA	qPCR
OLK10	OLK	ELISA	qPCR
OLK11	OLK	ELISA	qPCR	PEA
OLK12	OLK	ELISA	qPCR	PEA
OLP01	OLP	ELISA	qPCR
OLP02	OLP	ELISA	qPCR
OLP03	OLP	ELISA	qPCR
OLP04	OLP	ELISA	qPCR
OLP05	OLP	ELISA	qPCR
OLP06	OLP	ELISA	qPCR
OLP07	OLP			PEA
OLP08	OLP	ELISA	qPCR
OLP09	OLP	ELISA	qPCR
OLP10	OLP	ELISA	qPCR
OLP11	OLP	ELISA	qPCR
OLP12	OLP	ELISA	qPCR
OLP13	OLP	ELISA	qPCR	PEA
OLP14	OLP	ELISA	qPCR
OLP15	OLP	ELISA	qPCR
OLP16	OLP	ELISA	qPCR
OLP17	OLP			PEA
OLP18	OLP	ELISA	qPCR
OLP19	OLP	ELISA	qPCR
OLP20	OLP	ELISA	qPCR
OLP21	OLP	ELISA	qPCR
OLP22	OLP	ELISA	qPCR
OLP23	OLP	ELISA	qPCR
OLP24	OLP	ELISA	qPCR
OLP25	OLP	ELISA	qPCR
OSCC01	OSCC			PEA
OSCC02	OSCC			PEA
OSCC03	OSCC			PEA
CTRL01	Control			PEA
CTRL02	Control			PEA
CTRL03	Control			PEA
