# Supplementary material for: Examination of Oral Squamous Cell Carcinoma and Precancerous Lesions Using Proximity Extension Assay and Salivary RNA Quantification
Source: Biomedicines. 2020 Dec 14;8(12):610. doi: 10.3390/biomedicines8120610 (PMC7764999; doi:10.3390/biomedicines8120610)
Supplement: Supplementary file 1 [file biomedicines-08-00610-s001.zip › TableS2.xlsx]

## Sheet: Munka1
Protein name	Protein code	Uniprot ID	Olink ID	Panel
Artemin, ARTN	ARTN	Q5T4W7	OID00526	Olink INFLAMMATION(v.3004)
Axin-1, AXIN1	AXIN1	O15169	OID00487	Olink INFLAMMATION(v.3004)
Beta-nerve growth factor, Beta-NGF	Beta-NGF	P01138	OID00519	Olink INFLAMMATION(v.3004)
Brain-derived neurotrophic factor, BDNF	BDNF	P23560	OID00473	Olink INFLAMMATION(v.3004)
Caspase-8, CASP-8	CASP-8	Q14790	OID00550	Olink INFLAMMATION(v.3004)
C-C motif chemokine 19, CCL19	CCL19	Q99731	OID00513	Olink INFLAMMATION(v.3004)
C-C motif chemokine 20, CCL20	CCL20	P78556	OID00556	Olink INFLAMMATION(v.3004)
C-C motif chemokine 23, CCL23	CCL23	P55773	OID00530	Olink INFLAMMATION(v.3004)
C-C motif chemokine 25, CCL25	CCL25	O15444	OID00551	Olink INFLAMMATION(v.3004)
C-C motif chemokine 28, CCL28	CCL28	Q9NRJ3	OID00539	Olink INFLAMMATION(v.3004)
C-C motif chemokine 3, CCL3	CCL3	P10147	OID00532	Olink INFLAMMATION(v.3004)
C-C motif chemokine 4, CCL4	CCL4	P13236	OID00498	Olink INFLAMMATION(v.3004)
CD40L receptor, CD40	CD40	P25942	OID00542	Olink INFLAMMATION(v.3004)
CUB domain-containing protein 1, CDCP1	CDCP1	Q9H5V8	OID00476	Olink INFLAMMATION(v.3004)
C-X-C motif chemokine 1, CXCL1	CXCL1	P09341	OID00496	Olink INFLAMMATION(v.3004)
C-X-C motif chemokine 10, CXCL10	CXCL10	P02778	OID00535	Olink INFLAMMATION(v.3004)
C-X-C motif chemokine 11, CXCL11	CXCL11	O14625	OID00486	Olink INFLAMMATION(v.3004)
C-X-C motif chemokine 5, CXCL5	CXCL5	P42830	OID00520	Olink INFLAMMATION(v.3004)
C-X-C motif chemokine 6, CXCL6	CXCL6	P80162	OID00534	Olink INFLAMMATION(v.3004)
C-X-C motif chemokine 9, CXCL9	CXCL9	Q07325	OID00490	Olink INFLAMMATION(v.3004)
Cystatin D, CST5	CST5	P28325	OID00491	Olink INFLAMMATION(v.3004)
Deaminase, ADA	ADA	P00813	OID00560	Olink INFLAMMATION(v.3004)
Delta and Notch-like epidermal growth factor-related receptor, DNER	DNER	Q8NFT8	OID01213	Olink INFLAMMATION(v.3004)
Eotaxin, CCL11	CCL11	P51671	OID00505	Olink INFLAMMATION(v.3004)
Eukaryotic translation initiation factor 4E-binding protein 1, 4E-BP1	4E-BP1	Q13541	OID00536	Olink INFLAMMATION(v.3004)
Fibroblast growth factor 19, FGF-19	FGF-19	O95750	OID00545	Olink INFLAMMATION(v.3004)
Fibroblast growth factor 21, FGF-21	FGF-21	Q9NSA1	OID00512	Olink INFLAMMATION(v.3004)
Fibroblast growth factor 23, FGF-23	FGF-23	Q9GZV9	OID00507	Olink INFLAMMATION(v.3004)
Fibroblast growth factor 5, FGF-5	FGF-5	Q8NF90	OID00509	Olink INFLAMMATION(v.3004)
Fms-related tyrosine kinase 3 ligand, Flt3L	Flt3L	P49771	OID00533	Olink INFLAMMATION(v.3004)
Fractalkine, CX3CL1	CX3CL1	P78423	OID00552	Olink INFLAMMATION(v.3004)
Glial cell line-derived neurotrophic factor, GDNF	GDNF	P39905	OID00475	Olink INFLAMMATION(v.3004)
Hepatocyte growth factor, HGF	HGF	P14210	OID00522	Olink INFLAMMATION(v.3004)
Interferon gamma, IFN-gamma	IFN-gamma	P01579	OID00544	Olink INFLAMMATION(v.3004)
Interleukin-1 alpha, IL-1 alpha	IL-1 alpha	P01583	OID00493	Olink INFLAMMATION(v.3004)
Interleukin-10 receptor subunit alpha, IL-10RA	IL-10RA	Q13651	OID00508	Olink INFLAMMATION(v.3004)
Interleukin-10 receptor subunit beta, IL-10RB	IL-10RB	Q08334	OID00515	Olink INFLAMMATION(v.3004)
Interleukin-10, IL10	IL10	P22301	OID00528	Olink INFLAMMATION(v.3004)
Interleukin-12 subunit beta, IL-12B	IL-12B	P29460	OID00523	Olink INFLAMMATION(v.3004)
Interleukin-13, IL-13	IL13	P35225	OID00525	Olink INFLAMMATION(v.3004)
Interleukin-15 receptor subunit alpha, IL-15RA	IL-15RA	Q13261	OID00514	Olink INFLAMMATION(v.3004)
Interleukin-17A, IL-17A	IL-17A	Q16552	OID00485	Olink INFLAMMATION(v.3004)
Interleukin-17C, IL-17C	IL-17C	Q9P0M4	OID00483	Olink INFLAMMATION(v.3004)
Interleukin-18 receptor 1, IL-18R1	IL-18R1	Q13478	OID00517	Olink INFLAMMATION(v.3004)
Interleukin-18, IL-18	IL18	Q14116	OID00501	Olink INFLAMMATION(v.3004)
Interleukin-2 receptor subunit beta, IL-2RB	IL-2RB	P14784	OID00492	Olink INFLAMMATION(v.3004)
Interleukin-2, IL-2	IL2	P60568	OID00495	Olink INFLAMMATION(v.3004)
Interleukin-20 receptor subunit alpha, IL-20RA	IL-20RA	Q9UHF4	OID00489	Olink INFLAMMATION(v.3004)
Interleukin-20, IL-20	IL-20	Q9NYY1	OID00537	Olink INFLAMMATION(v.3004)
Interleukin-22 receptor subunit alpha-1, IL-22 RA1	IL-22 RA1	Q8N6P7	OID00516	Olink INFLAMMATION(v.3004)
Interleukin-24, IL-24	IL-24	Q13007	OID00524	Olink INFLAMMATION(v.3004)
Interleukin-33, IL-33	IL33	O95760	OID00543	Olink INFLAMMATION(v.3004)
Interleukin-4, IL-4	IL4	P05112	OID00546	Olink INFLAMMATION(v.3004)
Interleukin-5, IL5	IL5	P05113	OID00559	Olink INFLAMMATION(v.3004)
Interleukin-6, IL6	IL6	P05231	OID00482	Olink INFLAMMATION(v.3004)
Interleukin-7, IL-7	IL7	P13232	OID00478	Olink INFLAMMATION(v.3004)
Interleukin-8, IL-8	IL8	P10145	OID00471	Olink INFLAMMATION(v.3004)
Latency-associated peptide transforming growth factor beta-1, LAP TGF-beta-1	LAP TGF-beta-1	P01137	OID00480	Olink INFLAMMATION(v.3004)
Leukemia inhibitory factor receptor, LIF-R	LIF-R	P42702	OID00511	Olink INFLAMMATION(v.3004)
Leukemia inhibitory factor, LIF	LIF	P15018	OID00547	Olink INFLAMMATION(v.3004)
Macrophage colony-stimulating factor 1, CSF-1	CSF-1	P09603	OID00562	Olink INFLAMMATION(v.3004)
Matrix metalloproteinase-1, MMP-1	MMP-1	P03956	OID00510	Olink INFLAMMATION(v.3004)
Matrix metalloproteinase-10, MMP-10	MMP-10	P09238	OID00527	Olink INFLAMMATION(v.3004)
Monocyte chemotactic protein 1, MCP-1	MCP-1	P13500	OID00484	Olink INFLAMMATION(v.3004)
Monocyte chemotactic protein 2, MCP-2	MCP-2	P80075	OID00549	Olink INFLAMMATION(v.3004)
Monocyte chemotactic protein 3, MCP-3	MCP-3	P80098	OID00474	Olink INFLAMMATION(v.3004)
Monocyte chemotactic protein 4, MCP-4	MCP-4	Q99616	OID00504	Olink INFLAMMATION(v.3004)
Natural killer cell receptor 2B4, CD244	CD244	Q9BZW8	OID00477	Olink INFLAMMATION(v.3004)
Neurotrophin-3, NT-3	NT-3	P20783	OID00554	Olink INFLAMMATION(v.3004)
Neurturin, NRTN	NRTN	Q99748	OID00548	Olink INFLAMMATION(v.3004)
Oncostatin-M, OSM	OSM	P13725	OID00494	Olink INFLAMMATION(v.3004)
Osteoprotegerin, OPG	OPG	O00300	OID00479	Olink INFLAMMATION(v.3004)
Programmed cell death 1 ligand 1, PD-L1	PD-L1	Q9NZQ7	OID00518	Olink INFLAMMATION(v.3004)
Protein S100-A12, EN-RAGE	EN-RAGE	P80511	OID00541	Olink INFLAMMATION(v.3004)
Signaling lymphocytic activation molecule, SLAMF1	SLAMF1	Q13291	OID00502	Olink INFLAMMATION(v.3004)
SIR2-like protein 2, SIRT2	SIRT2	Q8IXJ6	OID00538	Olink INFLAMMATION(v.3004)
STAM-binding protein, STAMBP	STAMPB	O95630	OID00558	Olink INFLAMMATION(v.3004)
Stem cell factor, SCF	SCF	P21583	OID00500	Olink INFLAMMATION(v.3004)
Sulfotransferase 1A1, ST1A1	ST1A1	P50225	OID00557	Olink INFLAMMATION(v.3004)
T cell surface glycoprotein CD6 isoform, CD6	CD6	Q8WWJ7	OID00499	Olink INFLAMMATION(v.3004)
T-cell surface glycoprotein CD5, CD5	CD5	P06127	OID00531	Olink INFLAMMATION(v.3004)
Thymic stromal lymphopoietin, TSLP	TSLP	Q969D9	OID00497	Olink INFLAMMATION(v.3004)
TNF-beta, TNFB	TNFB	P01374	OID00561	Olink INFLAMMATION(v.3004)
TNF-related activation-induced cytokine, TRANCE	TRANCE	O14788	OID00521	Olink INFLAMMATION(v.3004)
TNF-related apoptosis-inducing ligand, TRAIL	TRAIL	P50591	OID00488	Olink INFLAMMATION(v.3004)
Transforming growth factor alpha, TGF-alpha	TGF-alpha	P01135	OID00503	Olink INFLAMMATION(v.3004)
Tumor necrosis factor ligand superfamily member 14, TNFSF14	TNFSF14	O43557	OID00506	Olink INFLAMMATION(v.3004)
Tumor necrosis factor receptor superfamily member 9, TNFRSF9	TNFRSF9	Q07011	OID00553	Olink INFLAMMATION(v.3004)
Tumor necrosis factor, Ligand superfamily, member 12, TWEAK	TWEAK	O43508	OID00555	Olink INFLAMMATION(v.3004)
Tumor necrosis factor, TNF	TNF	P01375	OID00529	Olink INFLAMMATION(v.3004)
Urokinase-type plasminogen activator, uPA	uPA	P00749	OID00481	Olink INFLAMMATION(v.3004)
Vascular endothelial growth factor A, VEGF-A	VEGFA	P15692	OID00472	Olink INFLAMMATION(v.3004)
				Olink ONCOLOGY II(v.7002)
