# Supplementary material for: Examination of Oral Squamous Cell Carcinoma and Precancerous Lesions Using Proximity Extension Assay and Salivary RNA Quantification
Source: Biomedicines. 2020 Dec 14;8(12):610. doi: 10.3390/biomedicines8120610 (PMC7764999; doi:10.3390/biomedicines8120610)
Supplement: Supplementary file 1 [file biomedicines-08-00610-s001.zip › TableS3.xlsx]

## Sheet: NPX Data
Panel	Olink INFLAMMATION(v.3004)	Olink INFLAMMATION(v.3004)	Olink INFLAMMATION(v.3004)	Olink INFLAMMATION(v.3004)	Olink INFLAMMATION(v.3004)	Olink INFLAMMATION(v.3004)	Olink INFLAMMATION(v.3004)	Olink INFLAMMATION(v.3004)	Olink INFLAMMATION(v.3004)	Olink INFLAMMATION(v.3004)	Olink INFLAMMATION(v.3004)	Olink INFLAMMATION(v.3004)	Olink INFLAMMATION(v.3004)	Olink INFLAMMATION(v.3004)	Olink INFLAMMATION(v.3004)	Olink INFLAMMATION(v.3004)	Olink INFLAMMATION(v.3004)	Olink INFLAMMATION(v.3004)	Olink INFLAMMATION(v.3004)	Olink INFLAMMATION(v.3004)	Olink INFLAMMATION(v.3004)	Olink INFLAMMATION(v.3004)	Olink INFLAMMATION(v.3004)	Olink INFLAMMATION(v.3004)	Olink INFLAMMATION(v.3004)	Olink INFLAMMATION(v.3004)	Olink INFLAMMATION(v.3004)	Olink INFLAMMATION(v.3004)	Olink INFLAMMATION(v.3004)	Olink INFLAMMATION(v.3004)	Olink INFLAMMATION(v.3004)	Olink INFLAMMATION(v.3004)	Olink INFLAMMATION(v.3004)	Olink INFLAMMATION(v.3004)	Olink INFLAMMATION(v.3004)	Olink INFLAMMATION(v.3004)	Olink INFLAMMATION(v.3004)	Olink INFLAMMATION(v.3004)	Olink INFLAMMATION(v.3004)	Olink INFLAMMATION(v.3004)	Olink INFLAMMATION(v.3004)	Olink INFLAMMATION(v.3004)	Olink INFLAMMATION(v.3004)	Olink INFLAMMATION(v.3004)	Olink INFLAMMATION(v.3004)	Olink INFLAMMATION(v.3004)	Olink INFLAMMATION(v.3004)	Olink INFLAMMATION(v.3004)	Olink INFLAMMATION(v.3004)
Assay	IL8	VEGFA	BDNF	MCP-3	GDNF	CDCP1	CD244	IL7	OPG	LAP TGF-beta-1	uPA	IL6	IL-17C	MCP-1	IL-17A	CXCL11	AXIN1	TRAIL	IL-20RA	CXCL9	CST5	IL-2RB	IL-1 alpha	OSM	IL2	CXCL1	TSLP	CCL4	CD6	SCF	IL18	SLAMF1	TGF-alpha	MCP-4	CCL11	TNFSF14	FGF-23	IL-10RA	FGF-5	MMP-1	LIF-R	FGF-21	CCL19	IL-15RA	IL-10RB	IL-22 RA1	IL-18R1	PD-L1	Beta-NGF
Uniprot ID	P10145	P15692	P23560	P80098	P39905	Q9H5V8	Q9BZW8	P13232	O00300	P01137	P00749	P05231	Q9P0M4	P13500	Q16552	O14625	O15169	P50591	Q9UHF4	Q07325	P28325	P14784	P01583	P13725	P60568	P09341	Q969D9	P13236	Q8WWJ7	P21583	Q14116	Q13291	P01135	Q99616	P51671	O43557	Q9GZV9	Q13651	Q8NF90	P03956	P42702	Q9NSA1	Q99731	Q13261	Q08334	Q8N6P7	Q13478	Q9NZQ7	P01138
OlinkID	OID00471	OID00472	OID00473	OID00474	OID00475	OID00476	OID00477	OID00478	OID00479	OID00480	OID00481	OID00482	OID00483	OID00484	OID00485	OID00486	OID00487	OID00488	OID00489	OID00490	OID00491	OID00492	OID00493	OID00494	OID00495	OID00496	OID00497	OID00498	OID00499	OID00500	OID00501	OID00502	OID00503	OID00504	OID00505	OID00506	OID00507	OID00508	OID00509	OID00510	OID00511	OID00512	OID00513	OID00514	OID00515	OID00516	OID00517	OID00518	OID00519
S1	12.1129	11.0626	0	0.48196	0.96127	5.5695	0.47389	2.22848	6.22012	3.40059	8.071	7.35197	0.27977	9.58166	0.04492	2.81128	0.14049	7.8141	0.01034	6.75612	8.24464	0.4059	6.0472	6.43153	0.17352	7.97975	0.27699	1.67432	0.07694	1.42864	5.23981	0.26481	2.6272	-0.54011	1.05042	3.01256	-0.3388	0.19509	0.00529	10.8712	1.30412	0.20457	1.29966	0.08653	2.57384	1.58193	4.84157	0.72355	-0.05614
S1_10	8.31839	7.50376	0	0.48196	0.55079	1.81275	0.47389	0.44609	2.79111	0.66307	4.54257	3.9239	0.27977	5.91068	0.04492	0.268	-0.00644	4.26321	0.01034	3.36054	9.16128	0.4059	2.57062	2.99264	0.17352	4.10974	0.03037	0.25568	-0.14792	0.32073	1.94488	0.26481	-0.48056	-0.54011	0.2568	0.49617	-0.3388	0.19509	0.00107	7.18263	0.11351	0.20457	-0.00533	0.08653	0.45685	1.58193	1.56713	0.72355	-0.05614
S10	13.5574	12.2412	0	0.48196	0.55079	7.82035	2.07087	4.24788	8.87376	5.31638	10.8689	11.8603	2.03011	11.4341	1.96212	3.83205	0.7157	10.0091	0.01034	9.47287	6.14655	0.4059	8.99945	8.3331	0.17352	11.4434	0.03037	6.91249	2.05885	4.61903	9.32431	0.26481	7.41754	-0.54011	1.11352	8.77212	-0.15533	0.19509	0.00107	13.2893	2.98626	0.66342	4.76723	0.08653	4.37056	1.58193	7.06847	1.67041	-0.05614
S10_10	10.7835	9.51921	0	0.48196	0.55079	4.80353	0.50628	1.62035	5.72307	2.36917	7.74921	8.69997	0.27977	7.97659	0.0862	1.20957	-0.00644	6.81125	0.01034	6.28503	8.44898	0.4059	6.78557	5.25832	0.17352	8.81314	0.03037	3.64612	-0.14792	1.38184	5.96472	0.26481	3.56227	-0.54011	0.2568	5.60353	-0.29819	0.19509	0.00107	10.3934	0.50056	0.20457	1.55302	0.08653	1.59388	1.58193	3.7102	0.72355	-0.05614
S11	9.3651	11.4645	0	0.48196	0.55079	4.99229	0.47389	2.41424	6.97016	2.02402	4.11647	3.98136	0.27977	9.21953	0.04492	2.01507	-0.00644	7.64614	0.01034	6.23528	6.86115	0.4059	6.68841	1.29486	0.17352	8.62764	0.03037	0.48667	-0.14792	1.90871	7.78663	0.26481	2.93932	-0.54011	1.05123	0.4485	-0.3388	0.19509	0.00107	4.70438	1.47361	0.20457	1.32683	0.08653	2.76032	1.58193	4.89226	0.72355	-0.05614
S11_10	5.84632	8.12096	0	0.48196	0.55079	1.49673	0.47389	0.45678	3.64232	0.20002	1.21358	1.39722	0.27977	5.71305	0.04492	0.23195	-0.00644	4.3224	0.01034	2.95894	8.6268	0.4059	3.31308	-0.1882	0.17352	4.89206	0.18968	0.12459	-0.14792	0.32073	4.31377	0.26481	0.16945	-0.54011	0.2568	-0.06173	-0.3388	0.19509	0.00107	1.44324	0.11351	0.20457	-0.00533	0.08653	0.55798	1.58193	1.80557	0.72355	-0.05614
S12	7.7609	10.9642	0	0.48196	0.55079	7.02721	0.47389	2.58766	6.68818	3.23309	6.45434	2.12808	0.27977	9.83721	0.04492	0.89507	-0.00644	6.27847	0.01034	3.50485	7.37566	0.4059	7.03367	3.5242	0.17352	6.79218	0.03037	2.71943	-0.13497	1.79665	8.45525	0.26481	3.60331	-0.54011	0.27576	2.52187	0.38689	1.19439	0.00107	6.02678	0.75065	0.20457	1.18108	0.08653	2.83778	1.58193	4.54062	0.72355	-0.05614
S12_10	4.34872	7.76873	0	0.48196	0.55079	3.41964	0.47389	0.48517	3.42997	0.71601	3.03995	0.6678	0.27977	6.28499	0.04492	0.23195	-0.00644	2.91553	0.01034	0.8658	9.09387	0.4059	3.79513	0.86764	0.17352	3.07649	0.03037	0.83446	-0.09701	0.32073	4.9475	0.26481	0.60462	-0.54011	0.2568	0.40242	-0.3388	0.36651	0.00107	2.67647	0.11351	0.20457	-0.00533	0.08653	0.78835	1.58193	1.42645	0.72355	-0.05614
S2	12.3137	12.2215	0	0.48196	0.55079	5.96963	0.63662	3.72725	8.61233	4.17156	9.52827	5.35373	0.27977	11.8583	0.04492	5.61492	0.1779	9.02439	0.01034	9.63693	7.27933	0.4059	8.95293	7.52435	0.17352	10.1423	0.03037	2.7497	0.43382	1.84348	7.8967	0.26481	4.61277	-0.54011	1.3491	6.89834	-0.15292	0.23237	0.00107	7.40877	3.4115	0.20457	2.04532	0.08653	3.75671	1.58193	6.67974	0.78058	-0.05614
S2_10	8.77078	9.09614	0	0.48196	0.55079	2.42933	0.47389	1.15466	5.23972	1.36445	6.19306	2.35093	0.27977	8.37685	0.04492	2.57723	-0.00644	5.69976	0.01034	6.51667	8.75582	0.4059	6.02008	4.27272	0.17352	6.48748	0.03037	0.75224	-0.14792	0.32073	4.72982	0.26481	1.392	-0.54011	0.2568	3.62856	-0.3388	0.19509	0.00107	4.13699	0.68715	0.20457	0.36229	0.08653	0.98461	1.58193	3.34613	0.72355	-0.05614
S3	10.7327	10.9602	0	0.48196	0.55079	4.39192	0.47389	2.99893	6.74038	1.76103	5.49235	2.64066	0.27977	9.82167	0.20664	3.51015	-0.00644	7.07284	0.01034	4.67671	6.82878	0.4059	5.07989	3.88677	0.17352	10.4416	0.03037	1.39141	-0.14792	0.98627	4.4246	0.26481	3.23524	-0.54011	1.04849	2.62599	-0.11704	0.19509	0.00107	5.92744	1.34946	0.20457	0.01833	0.08653	2.10032	1.58193	3.99584	0.92074	-0.05614
S3_10	7.34039	7.7352	0	0.48196	0.55079	1.16094	0.47389	0.68708	3.65621	0.25901	2.45475	0.72317	0.27977	6.41413	0.04492	0.75533	-0.00644	3.85399	0.01034	1.87417	8.71777	0.4059	1.83367	1.00317	0.17352	6.78821	0.03037	0.12459	-0.14792	0.32073	1.68756	0.26481	0.17941	-0.54011	0.2568	0.42352	-0.3388	0.19509	0.00107	2.82686	0.11351	0.20457	-0.00533	0.08653	0.45685	1.58193	1.2186	0.72355	-0.05614
S4	13.2649	11.1434	0	0.48196	0.55079	7.89647	0.47389	3.41156	5.3637	3.11102	7.62861	5.76683	2.84266	10.8077	5.40867	1.13987	-0.00644	6.98476	0.01034	7.38648	6.86054	0.4059	8.17381	7.06132	0.17352	11.1943	0.03037	3.54739	-0.14792	2.24133	7.96994	0.26481	6.87166	-0.54011	0.63213	5.54753	-0.3388	0.19509	0.00107	7.34511	1.58105	0.20457	3.43335	0.08653	3.48606	1.58193	4.97092	1.00917	-0.05614
S4_10	10.0711	8.01201	0	0.48196	0.55079	5.00543	0.47389	0.91213	2.24779	0.78478	4.39528	2.79907	0.47298	7.33406	2.12926	0.23195	-0.00644	3.71182	0.01034	4.18217	8.7659	0.4059	5.11934	3.85041	0.17352	7.89006	0.03037	1.22718	-0.14792	0.52591	4.65388	0.26481	2.94375	-0.54011	0.28863	2.44218	-0.3388	0.19509	0.00107	4.02389	0.20492	0.20457	0.67512	0.08653	1.0045	1.58193	1.90066	0.72355	-0.05614
S5	11.6708	11.2078	0	0.64962	0.656	4.21554	0.47389	2.29791	9.5052	1.99994	7.47586	7.05646	0.7209	9.30676	0.04492	2.59897	-0.00644	6.50724	0.01034	5.42666	8.31378	0.4059	5.86927	4.31333	0.17352	8.45999	0.03037	0.39458	-0.14792	1.35118	7.23096	0.26481	3.04877	-0.54011	0.88967	2.86353	-0.3388	0.19509	0.00107	10.2868	0.47289	0.20457	-0.00533	0.08653	2.809	1.58193	5.70334	0.72355	-0.05614
S5_10	8.22402	8.08175	0	0.48196	0.55079	1.06314	0.47389	0.30849	6.33846	0.50475	4.23353	3.97599	0.27977	6.0293	0.04492	0.59395	-0.00644	3.33347	0.01034	2.57922	9.45629	0.4059	2.69689	1.43039	0.17352	4.87569	0.03037	0.12459	-0.14792	0.32073	3.88477	0.26481	0.20918	-0.54011	0.2568	0.37549	-0.3388	0.19509	0.00107	6.97911	0.11351	0.20457	-0.00533	0.08653	0.56791	1.58193	2.60071	0.72355	-0.05614
S6	11.2017	11.14	0	0.48196	0.55079	4.41051	0.47389	3.29877	6.11596	2.34758	6.24013	3.52449	0.27977	12.5452	1.86981	6.01611	0.08158	8.02132	0.01034	7.14974	7.86224	0.4059	4.12403	3.37491	0.17352	11.7561	0.03037	1.46128	-0.08794	1.73647	3.78447	0.26481	4.07266	-0.54011	1.92223	1.48825	-0.3388	0.19509	0.00107	6.74553	1.71392	0.20457	1.7595	0.08653	2.75856	1.58193	5.34374	0.72355	-0.05614
S6_10	7.76741	7.86311	0	0.48196	0.55079	1.13391	0.47389	0.88248	3.05024	0.2503	3.05311	1.08718	0.27977	9.23183	0.04492	2.9604	-0.00644	4.69205	0.01034	3.98342	9.34176	0.4059	1.07338	0.75437	0.17352	8.61984	0.03037	0.192	-0.14792	0.32073	1.22563	0.26481	0.6702	-0.54011	0.50063	0.3628	-0.3388	0.19509	0.00107	3.46038	0.11351	0.20457	-0.00533	0.08653	0.80202	1.58193	2.29427	0.72355	-0.05614
S7	12.9679	12.1728	0	0.48196	0.55079	7.091	0.47389	4.46567	7.53064	4.06115	8.89618	4.88203	3.51455	10.7579	3.13391	2.52287	0.02937	8.98505	0.01034	7.23114	6.1265	0.4059	7.97424	7.30121	0.17352	9.47088	0.03037	2.78378	-0.0725	2.61793	9.23374	0.26481	5.18996	-0.54011	1.75592	6.07766	-0.31668	2.18837	0.00107	8.35592	1.95745	0.20457	3.88493	0.08653	3.56599	1.58193	6.03631	1.26617	-0.05614
S7_10	9.60219	9.22957	0	0.48196	0.55079	3.50393	0.47389	1.66631	4.14988	1.2824	5.66141	2.05821	0.79271	7.29714	0.52121	0.48855	-0.00644	5.6354	0.01034	4.06836	8.10852	0.4059	4.77798	3.9888	0.17352	5.68063	0.03037	0.45467	-0.14792	0.32073	5.76029	0.26481	1.6708	-0.54011	0.2568	2.7879	-0.3388	0.38483	0.00107	5.01005	0.11351	0.20457	0.69995	0.08653	1.04725	1.58193	2.71079	0.72355	-0.05614
S8	10.7935	11.1472	0	0.48196	0.55079	4.88479	0.47389	2.23607	7.45711	3.47657	8.46315	3.1129	0.27977	9.89507	0.0817	1.16873	0.0215	7.30896	0.01034	6.14446	7.45562	0.4059	7.85353	6.33594	0.17352	7.65201	0.03037	1.82621	-0.00348	1.15671	7.35265	0.26481	3.39739	-0.54011	0.56889	5.61265	-0.3388	0.19509	0.00107	8.1557	1.46707	0.20457	0.211	0.08653	2.92614	1.58193	5.26963	0.72355	-0.05614
S8_10	7.45942	7.99642	0	0.48196	0.55079	1.53135	0.47389	0.52051	4.22713	0.99515	5.26719	0.82581	0.27977	6.40726	0.04492	0.23195	-0.00644	4.11173	0.01034	3.08784	9.10974	0.4059	4.64761	3.08639	0.17352	4.09659	0.03037	0.32992	-0.14792	0.32073	4.0693	0.26481	0.5195	-0.54011	0.2568	2.55559	-0.30162	0.19509	0.00107	4.85213	0.11351	0.20457	-0.00533	0.08653	0.78663	1.58193	2.1329	0.72355	0.03114
S9	13.3384	11.2013	0	0.48196	0.55079	4.62212	0.47389	2.2543	7.86648	4.44136	9.07357	9.19345	0.27977	8.03316	0.86152	2.13992	-0.00644	7.23006	0.01034	5.38332	7.2602	0.4059	6.79981	7.07447	0.17352	8.49724	0.03037	4.05799	0.18081	2.45463	6.30824	0.26481	3.0405	-0.54011	0.87245	4.27544	0.07929	0.19509	0.00107	12.7705	0.9658	0.20457	0.05663	0.08653	3.14456	1.58193	5.29108	0.72355	0.41924
S9_10	9.65687	7.54447	0	0.48196	0.55079	1.02456	0.47389	0.35474	4.21309	1.19707	5.41556	5.62221	0.27977	4.2983	0.04492	0.23195	-0.00644	3.56036	0.01034	1.96562	8.93526	0.4059	3.21842	3.55384	0.17352	4.47232	0.03037	1.12773	-0.14792	0.32073	2.83788	0.26481	0.11225	-0.54011	0.2568	1.11006	-0.3388	0.19509	0.00107	8.97158	0.11351	0.20457	-0.00533	0.08653	0.74489	1.58193	1.69921	0.72355	-0.05614
LOD	0.03542	0.23642		0.48196	0.55079	-0.49795	0.47389	0.27072	0.30323	0.18974	0.14566	0.2819	0.27977	0.08962	0.04492	0.23195	-0.00644	0.13983	0.01034	0.11852	-1.89582	0.4059	-1.78883	-0.1882	0.17352	0.57415	0.03037	0.12459	-0.14792	0.32073	0.47507	0.26481	-0.76773	-0.54011	0.2568	-0.06173	-0.3388	0.19509	0.00107	-0.47372	0.11351	0.20457	-0.00533	0.08653	0.45685	1.58193	0.34244	0.72355	-0.05614
Missing Data freq.	0	0	1	0.92308	0.84615	0	0.80769	0	0	0	0	0	0.73077	0	0.61538	0.19231	0.69231	0	0.92308	0	0	1	0.07692	0.03846	1	0	0.92308	0.11538	0.57692	0.38462	0	0.92308	0	0.92308	0.38462	0.03846	0.61538	0.73077	0.92308	0	0.34615	0.88462	0.34615	1	0.07692	1	0	0.73077	0.84615
Detectability	1	1	0	0.07692	0.15385	1	0.19231	1	1	1	1	1	0.26923	1	0.38462	0.80769	0.30769	1	0.07692	1	1	0	0.92308	0.96154	0	1	0.07692	0.88462	0.42308	0.61538	1	0.07692	1	0.07692	0.61538	0.96154	0.38462	0.26923	0.07692	1	0.65385	0.11538	0.65385	0	0.92308	0	1	0.26923	0.15385
[truncated: 139 more columns]
