# Supplementary figures and images for: Examination of Oral Squamous Cell Carcinoma and Precancerous Lesions Using Proximity Extension Assay and Salivary RNA Quantification
Source: MDPI journal article supplement (doi:10.3390/biomedicines8120610), 2020-12-14

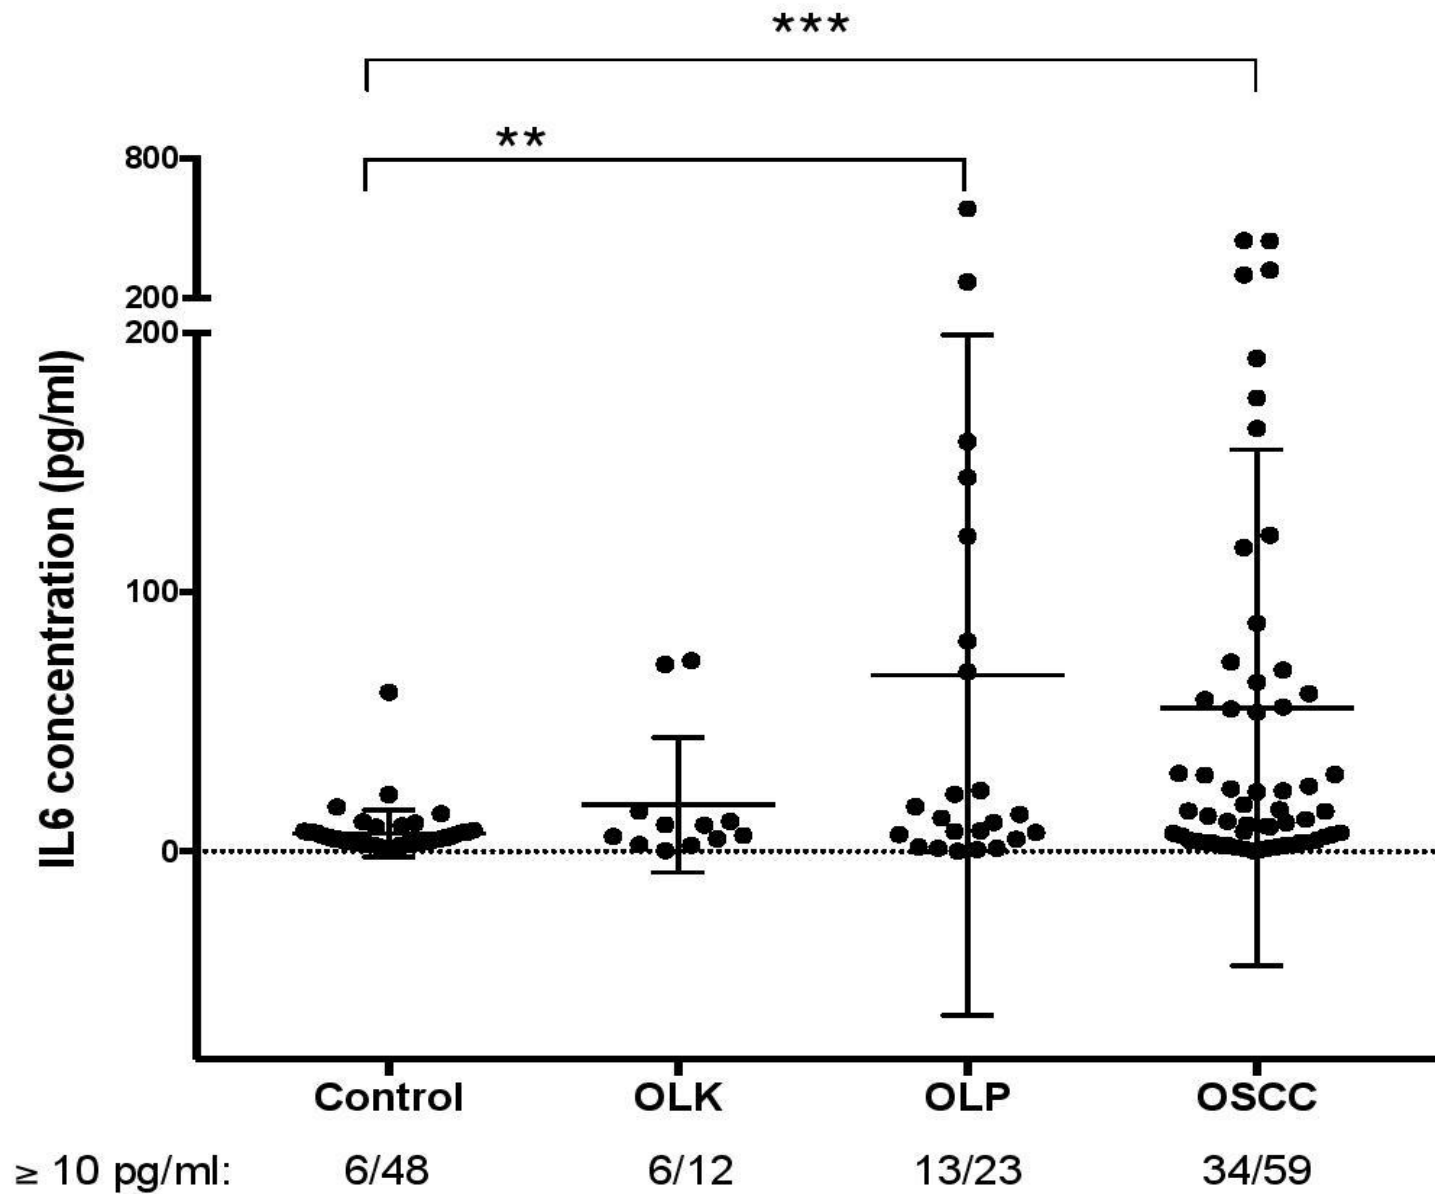

Supplement: s1 [file s1]
